# Supplementary material for: Overexpression of Arabidopsis thaliana ERI, the homolog of C. elegans Enhancer of RNAinterference, leads to enhanced growth
Source: Front Plant Sci. 2015 Jul 22;6:531. doi: 10.3389/fpls.2015.00531 (PMC4510415; doi:10.3389/fpls.2015.00531)
Supplement: Supplementary file 1 [file Table1.XLSX]

## Sheet: Tabelle1
Supplementary table 1		miR
Feature ID	Small RNA - Length	Small RNA - Name	Small RNA - Resource	Small RNA - Match type	Small RNA - Mismatches	Experiment - Range (normalized values)	Experiment - IQR (normalized values)	Experiment - Range (original values)	Experiment - IQR (original values)	Experiment - Difference (normalized values)	Experiment - Fold Change (normalized values)	Experiment - Difference (original values)	Experiment - Fold Change (original values)	control - miR Col annotated - Expression values	control - miR Col annotated - Normalized expression values	control - miR Col annotated - Count	control - Normalized means	control - Means	oe - miR OE sample annotated - Expression values	oe - miR OE sample annotated - Normalized expression values	oe - miR OE sample annotated - Count	oe - Normalized means	oe - Means
ATACGAGCCACTGGAAACTG	20	ath-miR841b-5p	miRBASE2014	Variant	1	4821.57	4821.57	221	221	-4821.57	-12.9079	-221	-8.12903	252	5226.48	252	5226.48	252	31	404.906	31	404.906	31
ATACGAGCCACTTGAAACTG	20	ath-miR841a-5p	miRBASE2014	Variant	1	1398.68	1398.68	53	53	-1398.68	-3.74576	-53	-2.35897	92	1908.08	92	1908.08	92	39	509.398	39	509.398	39
GTGTTCTCAGGTCACCCCGG	20	ath-miR398b-3p//ath-miR398c-3p//aly-miR398b-3p//bra-miR398-3p	miRBASE2014	Variant	1	643.652	643.652	24	24	-643.652	-3.59361	-24	-2.26316	43	891.82	43	891.82	43	19	248.168	19	248.168	19
TCGATAAACCTCTGCATCCA	20	ath-miR162a-3p//ath-miR162b-3p//osa-miR162a//zma-miR162-3p//mtr-miR162//ptc-miR162a//ptc-miR162b//ghr-miR162a//cpa-miR162a//vvi-miR162//gma-miR162a//sly-miR162//sbi-miR162//csi-miR162-3p//rco-miR162//aly-miR162a-3p//aly-miR162b-3p//tcc-miR162//gma-miR162b//gma-miR162c//aau-miR162//vun-miR162//lus-miR162a//lus-miR162b//nta-miR162a//nta-miR162b//pde-miR162//htu-miR162a//hpe-miR162a//mdm-miR162a//md…	miRBASE2014	Exact	0	464.671	464.671	15	15	-464.671	-2.77878	-15	-1.75	35	725.9	35	725.9	35	20	261.23	20	261.23	20
TGCACTGCCTCTTCCCTGGC	20	ath-miR408-3p//osa-miR408-3p//sof-miR408a//sof-miR408b//sof-miR408c//sof-miR408d//zma-miR408a//ptc-miR408-3p//pta-miR408//ppt-miR408b//smo-miR408//tae-miR408//vvi-miR408//sbi-miR408//zma-miR408b-3p//rco-miR408//aly-miR408-3p//ahy-miR408-3p//csi-miR408//gma-miR408d//bdi-miR408-3p//ssp-miR408d//ssp-miR408a//gma-miR408a-3p//gma-miR408b-3p//gma-miR408c-3p//mtr-miR408-3p//vun-miR408//dpr-miR408//mes-m…	miRBASE2014	Exact	0	935.436	935.436	24	24	-935.436	-2.25645	-24	-1.42105	81	1679.94	81	1679.94	81	57	744.504	57	744.504	57
CCCAAATGTAGACAAAGCG	19	ath-miR158a-3p//ath-miR158b//aly-miR158a-3p//aly-miR158b-3p	miRBASE2014	Variant	1	471.557	471.557	12	12	-471.557	-2.24493	-12	-1.41379	41	850.34	41	850.34	41	29	378.783	29	378.783	29
CGAACCAGGCTTCATTCCCC	20	osa-miR166e-3p	miRBASE2014	Exact	0	278.01	278.01	6	6	-278.01	-2.06424	-6	-1.3	26	539.24	26	539.24	26	20	261.23	20	261.23	20
CGCTTGGTGCAGGTCGGGAAC	21	ath-miR168a-5p//ath-miR168b-5p//gma-miR168a//ptc-miR168a-5p//ptc-miR168b-5p//bna-miR168a//vvi-miR168//ccl-miR168//crt-miR168//rco-miR168//aly-miR168a-5p//aly-miR168b-5p//tcc-miR168//mtr-miR168b//mtr-miR168c-5p//vun-miR168//mes-miR168a//cca-miR168a//lus-miR168a//lus-miR168b//nta-miR168d//nta-miR168e//mdm-miR168a//mdm-miR168b//ppe-miR168//atr-miR168//bra-miR168a-5p	miRBASE2014	Variant	1	1693.39	1693.39	35	35	-1693.39	-2.02895	-35	-1.27778	161	3339.14	161	3339.14	161	126	1645.75	126	1645.75	126
TCGGACCAGGCTTCATCCCCC	21	ath-miR165a-3p//ath-miR165b//bna-miR166f//lus-miR166b	miRBASE2014	Exact	0	979.923	979.923	18	18	-979.923	-1.94967	-18	-1.22785	97	2011.78	97	2011.78	97	79	1031.86	79	1031.86	79
CGGACCAGGCTTCATCCCCC	20	ath-miR165a-3p//ath-miR165b//bna-miR166f//lus-miR166b	miRBASE2014	Exact	0	111751	111751	1971	1971	-111751	-1.92695	-1971	-1.21354	11201	232309	11201	232309	11201	9230	120557	9230	120557	9230
GAAAGTGACTACATCGGGG	19	ath-miR161.1//aly-miR161-5p.1	miRBASE2014	Exact	0	236.53	236.53	4	4	-236.53	-1.90545	-4	-1.2	24	497.76	24	497.76	24	20	261.23	20	261.23	20
CGGACCAGGCTTCATCCCC	19	ath-miR165a-3p//ath-miR165b//aly-miR165a-3p//aly-miR165b-3p//bna-miR166f//lus-miR166b	miRBASE2014	Exact	0	542.168	542.168	8	8	-542.168	-1.84712	-8	-1.16327	57	1182.18	57	1182.18	57	49	640.013	49	640.013	49
GCAGTCTCCTTGGCTATCC	19	aly-miR169j-3p//aly-miR169k-3p//aly-miR169l-3p	miRBASE2014	Variant	1	135.918	135.918	1	1	-135.918	-1.69373	-1	-1.06667	16	331.84	16	331.84	16	15	195.922	15	195.922	15
AGGAGTGGCATGTGAACACA	20	ath-miR398a-5p	miRBASE2014	Exact	0	174.31	174.31	1	1	-174.31	-1.66727	-1	-1.05	21	435.54	21	435.54	21	20	261.23	20	261.23	20
CGGACCAGGCTTCATTCCCCC	21	ctr-miR166//csi-miR166a//lus-miR166i//hbr-miR166b//lus-miR166k	miRBASE2014	Exact	0	867.673	867.673	0	0	-867.673	-1.58788	0	-1	113	2343.62	113	2343.62	113	113	1475.95	113	1475.95	113
TCGTTGTAGTATAGT	15	gma-miR6300	miRBASE2014	Exact	0	145.892	145.892	0	0	-145.892	-1.58788	0	-1	19	394.06	19	394.06	19	19	248.168	19	248.168	19
CTCTCTAGCCTTCTGTCATC	20	ath-miR157a-3p//ath-miR157b-3p//aly-miR157a-3p	miRBASE2014	Exact	0	115.178	115.178	0	0	-115.178	-1.58788	0	-1	15	311.1	15	311.1	15	15	195.922	15	195.922	15
CCGCCTTGCATCAACTGAAT	20	ath-miR168a-3p//ptc-miR168a-3p//ptc-miR168b-3p//aly-miR168a-3p//mtr-miR168c-3p//sly-miR168b-3p//bra-miR168b-3p//bra-miR168c-3p	miRBASE2014	Exact	0	4595.56	4595.56	5	5	-4595.56	-1.5749	5	1.00824	607	12589.2	607	12589.2	607	612	7993.63	612	7993.63	612
CGATAAACCTCTGCATCCA	19	ath-miR162a-3p//ath-miR162b-3p//osa-miR162a//zma-miR162-3p//mtr-miR162//ptc-miR162a//ptc-miR162b//ghr-miR162a//cpa-miR162a//vvi-miR162//gma-miR162a//sly-miR162//sbi-miR162//csi-miR162-3p//rco-miR162//aly-miR162a-3p//aly-miR162b-3p//tcc-miR162//gma-miR162b//gma-miR162c//aau-miR162//vun-miR162//lus-miR162a//lus-miR162b//nta-miR162a//nta-miR162b//pde-miR162//htu-miR162a//hpe-miR162a//mdm-miR162a//md…	miRBASE2014	Exact	0	367.777	367.777	3	3	-367.777	-1.50281	3	1.0566	53	1099.22	53	1099.22	53	56	731.443	56	731.443	56
GAAGCTGCCAGCATGATCTGT	21	ath-miR167d//osa-miR167d-5p//osa-miR167e-5p//osa-miR167f//osa-miR167g//osa-miR167h-5p//osa-miR167i-5p//osa-miR167j//sbi-miR167d//sbi-miR167f//sbi-miR167g//sbi-miR167e//sbi-miR167c//sof-miR167a//sof-miR167b//zma-miR167e-5p//zma-miR167f-5p//zma-miR167g-5p//zma-miR167h-5p//zma-miR167i-5p//ptc-miR167e//vvi-miR167a//gma-miR167c//lja-miR167//sbi-miR167h//zma-miR167j-5p//ccl-miR167a//ctr-miR167//ccl-miR…	miRBASE2014	Variant	1	117.473	117.473	1	1	-117.473	-1.49966	1	1.05882	17	352.58	17	352.58	17	18	235.107	18	235.107	18
TCGTTGTAGTATAGTG	16	gma-miR6300	miRBASE2014	Exact	0	135.126	135.126	2	2	-135.126	-1.4498	2	1.09524	21	435.54	21	435.54	21	23	300.414	23	300.414	23
TGCGATCTCTTTGGAT	16	ath-miR393b-3p//aly-miR393b-3p	miRBASE2014	Exact	0	297.879	297.879	6	6	-297.879	-1.41465	6	1.12245	49	1016.26	49	1016.26	49	55	718.381	55	718.381	55
TTCTAGTGGGTCGTATTCAC	20	ath-miR841a-3p	miRBASE2014	Variant	1	3113.12	3113.12	65	65	-3113.12	-1.41023	65	1.12597	516	10701.8	516	10701.8	516	581	7588.72	581	7588.72	581
CGCTTGGTGCAGGTCGGGAACC	22	ath-miR168a-5p//ath-miR168b-5p//gma-miR168a//ptc-miR168a-5p//ptc-miR168b-5p//bna-miR168a//vvi-miR168//ccl-miR168//crt-miR168//rco-miR168//aly-miR168a-5p//aly-miR168b-5p//tcc-miR168//mtr-miR168b//mtr-miR168c-5p//vun-miR168//mes-miR168a//cca-miR168a//lus-miR168a//lus-miR168b//nta-miR168d//nta-miR168e//mdm-miR168a//mdm-miR168b//ppe-miR168//atr-miR168//bra-miR168a-5p	miRBASE2014	Variant	2	172.727	172.727	5	5	-172.727	-1.36734	5	1.16129	31	642.94	31	642.94	31	36	470.213	36	470.213	36
ACGAGCCACTTGAAACTGAA	20	ath-miR841a-5p	miRBASE2014	Exact	0	551.19	551.19	16	16	-551.19	-1.36695	16	1.16162	99	2053.26	99	2053.26	99	115	1502.07	115	1502.07	115
GACTGTTGTCTGGCTCGAGG	20	ath-miR166a-5p//ath-miR166b-5p//aly-miR166b-5p	miRBASE2014	Exact	0	1126.13	1126.13	39	39	-1126.13	-1.34213	39	1.1831	213	4417.62	213	4417.62	213	252	3291.49	252	3291.49	252
CGCTTGGTGCAGGTCGGGAA	20	ath-miR168a-5p//ath-miR168b-5p//gma-miR168a//ptc-miR168a-5p//ptc-miR168b-5p//bna-miR168a//vvi-miR168//ccl-miR168//crt-miR168//rco-miR168//aly-miR168a-5p//aly-miR168b-5p//tcc-miR168//mtr-miR168b//mtr-miR168c-5p//vun-miR168//mes-miR168a//cca-miR168a//lus-miR168a//lus-miR168b//nta-miR168d//nta-miR168e//mdm-miR168a//mdm-miR168b//ppe-miR168//atr-miR168//bra-miR168a-5p	miRBASE2014	Exact	0	3309.12	3309.12	137	137	-3309.12	-1.31629	137	1.20633	664	13771.4	664	13771.4	664	801	10462.2	801	10462.2	801
TGACAGAAGATAGAGAGCAC	20	ath-miR157a-5p//ath-miR157b-5p//ath-miR157c-5p//ath-miR157d//gma-miR156d//gma-miR156e//gma-miR156c//ptc-miR156g//ptc-miR156h//ptc-miR156i//ptc-miR156j//mtr-miR156e//mtr-miR156f//mtr-miR156h-5p//gra-miR157a//gra-miR157b//smo-miR156b//bna-miR156b//bna-miR156c//vvi-miR156f//vvi-miR156g//vvi-miR156i//sly-miR156a//sly-miR156b//sly-miR156c//bra-miR157a//bol-miR157a//aqc-miR156b//aqc-miR156a//rco-miR156…	miRBASE2014	Exact	0	22631	22631	1339	1339	-22631	-1.26396	1339	1.25627	5225	108367	5225	108367	5225	6564	85735.6	6564	85735.6	6564
TGACAGAAGATAGAGAGCACCC	22	ath-miR157a-5p//ath-miR157b-5p//ath-miR157c-5p//ath-miR157d//gma-miR156d//gma-miR156e//gma-miR156c//ptc-miR156g//ptc-miR156h//ptc-miR156i//ptc-miR156j//mtr-miR156e//mtr-miR156f//mtr-miR156h-5p//gra-miR157a//gra-miR157b//smo-miR156b//bna-miR156b//bna-miR156c//vvi-miR156f//vvi-miR156g//vvi-miR156i//sly-miR156a//sly-miR156b//sly-miR156c//bra-miR157a//bol-miR157a//aqc-miR156b//aqc-miR156a//rco-miR156…	miRBASE2014	Variant	2	244.049	244.049	16	16	-244.049	-1.24913	16	1.27119	59	1223.66	59	1223.66	59	75	979.611	75	979.611	75
CGATAAACCTCTGCATCC	18	ath-miR162a-3p//ath-miR162b-3p//osa-miR162a//zma-miR162-3p//mtr-miR162//ptc-miR162a//ptc-miR162b//ghr-miR162a//cpa-miR162a//vvi-miR162//gma-miR162a//sly-miR162//sbi-miR162//csi-miR162-3p//rco-miR162//aly-miR162a-3p//aly-miR162b-3p//tcc-miR162//gma-miR162b//bdi-miR162//gma-miR162c//aau-miR162//vun-miR162//lus-miR162a//lus-miR162b//nta-miR162a//nta-miR162b//pde-miR162//htu-miR162a//hpe-miR162a//mdm…	miRBASE2014	Exact	0	112.802	112.802	9	9	-112.802	-1.22144	9	1.3	30	622.2	30	622.2	30	39	509.398	39	509.398	39
TGGACTGAAGGGAGCTCCC	19	ath-miR319a//ath-miR319b//mtr-miR319a-3p//gma-miR319a//gma-miR319b//ptc-miR319a//ptc-miR319b//ptc-miR319c//ptc-miR319d//ppt-miR319c//ppt-miR319d-3p//mtr-miR319b-3p//ppt-miR319e//vvi-miR319b//vvi-miR319c//vvi-miR319f//vvi-miR319g//aqc-miR319//ctr-miR319//rco-miR319a//rco-miR319b//rco-miR319c//aly-miR319a-3p//aly-miR319b-3p//tae-miR319//gma-miR319e//gma-miR319h//gma-miR319j//gma-miR319k//gma-miR319…	miRBASE2014	Exact	0	180.325	180.325	15	15	-180.325	-1.21572	15	1.30612	49	1016.26	49	1016.26	49	64	835.935	64	835.935	64
AGCTCAGGAGGGATAGCGCC	20	ath-miR390a-5p//ath-miR390b-5p//osa-miR390-5p//ptc-miR390a//ptc-miR390b//ptc-miR390c//ptc-miR390d-5p//ppt-miR390a//ppt-miR390b//ppt-miR390c-5p//mtr-miR390//ghr-miR390a//ghr-miR390b//ghr-miR390c//bna-miR390a//bna-miR390b//bna-miR390c//vvi-miR390//gma-miR390a-5p//sbi-miR390//zma-miR390a-5p//zma-miR390b-5p//csi-miR390//rco-miR390a//rco-miR390b//aly-miR390a-5p//aly-miR390b-5p//tcc-miR390a//tcc-miR390…	miRBASE2014	Exact	0	1144.01	1144.01	107	107	-1144.01	-1.19997	107	1.32326	331	6864.94	331	6864.94	331	438	5720.93	438	5720.93	438
CGATAAACCTCTGCATCCAG	20	ath-miR162a-3p//ath-miR162b-3p//osa-miR162a//mtr-miR162//ptc-miR162a//ptc-miR162b//ghr-miR162a//cpa-miR162a//vvi-miR162//sly-miR162//sbi-miR162//csi-miR162-3p//rco-miR162//aly-miR162a-3p//aly-miR162b-3p//tcc-miR162//gma-miR162b//gma-miR162c//aau-miR162//vun-miR162//lus-miR162a//lus-miR162b//nta-miR162a//nta-miR162b//pde-miR162//htu-miR162a//hpe-miR162a//mdm-miR162a//mdm-miR162b//cme-miR162//mes-m…	miRBASE2014	Exact	0	3225.82	3225.82	375	375	-3225.82	-1.17235	375	1.35444	1058	21942.9	1058	21942.9	1058	1433	18717.1	1433	18717.1	1433
GCAGTCTCCTTGGCTATC	18	aly-miR169j-3p//aly-miR169k-3p//aly-miR169l-3p	miRBASE2014	Exact	0	95.0698	95.0698	18	18	-95.0698	-1.11932	18	1.4186	43	891.82	43	891.82	43	61	796.75	61	796.75	61
CGCTTGGTGCAGGTCGGGA	19	ath-miR168a-5p//ath-miR168b-5p//gma-miR168a//ptc-miR168a-5p//ptc-miR168b-5p//bna-miR168a//vvi-miR168//ccl-miR168//crt-miR168//rco-miR168//aly-miR168a-5p//aly-miR168b-5p//tcc-miR168//cme-miR168//mtr-miR168b//mtr-miR168c-5p//vun-miR168//mes-miR168a//cca-miR168a//lus-miR168a//lus-miR168b//nta-miR168a//nta-miR168b//nta-miR168c//nta-miR168d//nta-miR168e//mdm-miR168a//mdm-miR168b//sly-miR168a-5p//sly-m…	miRBASE2014	Exact	0	126.496	126.496	25	25	-126.496	-1.11529	25	1.42373	59	1223.66	59	1223.66	59	84	1097.16	84	1097.16	84
GACAGAAGATAGAGAGCAC	19	ath-miR157a-5p//ath-miR157b-5p//ath-miR157c-5p//ath-miR157d//gma-miR156d//gma-miR156e//gma-miR156c//ptc-miR156g//ptc-miR156h//ptc-miR156i//ptc-miR156j//mtr-miR156e//mtr-miR156f//mtr-miR156h-5p//gra-miR157a//gra-miR157b//smo-miR156b//bna-miR156b//bna-miR156c//vvi-miR156f//vvi-miR156g//vvi-miR156i//sly-miR156a//sly-miR156b//sly-miR156c//bra-miR157a//bol-miR157a//aqc-miR156b//aqc-miR156a//rco-miR156…	miRBASE2014	Exact	0	752.8	752.8	154	154	-752.8	-1.11213	154	1.42778	360	7466.4	360	7466.4	360	514	6713.6	514	6713.6	514
CCCCGGCAACGGCGCCA	17	ath-miR8175	miRBASE2014	Exact	0	42.9038	42.9038	12	12	-42.9038	-1.08644	12	1.46154	26	539.24	26	539.24	26	38	496.336	38	496.336	38
GTGTTCTCAGGTCACCCC	18	ath-miR398a-3p//ath-miR398b-3p//ath-miR398c-3p//osa-miR398a//gma-miR398a//gma-miR398b//ptc-miR398a//mtr-miR398a-3p//vvi-miR398a//bol-miR398a-3p//aqc-miR398a//csi-miR398//rco-miR398a//gra-miR398//ghr-miR398//aly-miR398a-3p//aly-miR398b-3p//ahy-miR398//tcc-miR398b//ssl-miR398//lus-miR398b//lus-miR398c//mdm-miR398a//cme-miR398b//stu-miR398b-3p//lus-miR398d//lus-miR398e//bra-miR398-3p	miRBASE2014	Exact	0	26.043	26.043	8	8	-26.043	-1.07976	8	1.47059	17	352.58	17	352.58	17	25	326.537	25	326.537	25
CCCAAATGTAGACAAAGCAC	20	ath-miR158a-3p//ath-miR158b//aly-miR158a-3p	miRBASE2014	Variant	1	42.112	42.112	15	15	-42.112	-1.07009	15	1.48387	31	642.94	31	642.94	31	46	600.828	46	600.828	46
TGGACCAGGCTTCATTCCCC	20	mes-miR166i	miRBASE2014	Exact	0	20.6601	20.6601	9	9	-20.6601	-1.05858	9	1.5	18	373.32	18	373.32	18	27	352.66	27	352.66	27
CCCGCCTTGCATCAACTGAAT	21	ath-miR168a-3p//ptc-miR168a-3p//ptc-miR168b-3p//aly-miR168a-3p//mtr-miR168c-3p//sly-miR168b-3p//bra-miR168b-3p//bra-miR168c-3p	miRBASE2014	Exact	0	26.755	26.755	15	15	-26.755	-1.04655	15	1.51724	29	601.46	29	601.46	29	44	574.705	44	574.705	44
GCAAGTTGTCCTTGGC	16	ath-miR169a-3p//zma-miR169r-3p//aly-miR169a-3p//ata-miR169d-3p	miRBASE2014	Exact	0	12.9816	12.9816	9	9	-12.9816	-1.03823	9	1.52941	17	352.58	17	352.58	17	26	339.598	26	339.598	26
TCGAGGCCTATTAAACTT	18	ath-miR402	miRBASE2014	Variant	1	10.686	10.686	8	8	-10.686	-1.03557	8	1.53333	15	311.1	15	311.1	15	23	300.414	23	300.414	23
TTGGATTGAAGGGAGCTCTT	20	ath-miR159b-3p//aly-miR159b-3p//lus-miR159c	miRBASE2014	Exact	0	1229.1	1229.1	1278	1278	-1229.1	-1.02605	1278	1.54756	2334	48407.2	2334	48407.2	2334	3612	47178.1	3612	47178.1	3612
TTGGACTGAAGGGAGCTCCC	20	ath-miR319a//ath-miR319b//mtr-miR319a-3p//gma-miR319a//gma-miR319b//ptc-miR319a//ptc-miR319b//ptc-miR319c//ptc-miR319d//ppt-miR319c//ppt-miR319d-3p//mtr-miR319b-3p//ppt-miR319e//vvi-miR319b//vvi-miR319c//vvi-miR319f//vvi-miR319g//aqc-miR319//ctr-miR319//rco-miR319a//rco-miR319b//rco-miR319c//aly-miR319a-3p//aly-miR319b-3p//tae-miR319//gma-miR319e//gma-miR319h//gma-miR319j//gma-miR319k//gma-miR319…	miRBASE2014	Exact	0	15.1972	15.1972	20	20	-15.1972	-1.02078	20	1.55556	36	746.64	36	746.64	36	56	731.443	56	731.443	56
TAGATTCACGCACAAACTCT	20	ath-miR403-3p//ptc-miR403a//ptc-miR403b//ptc-miR403c-3p//vvi-miR403a//vvi-miR403b//vvi-miR403c//vvi-miR403d//vvi-miR403e//vvi-miR403f//rco-miR403a//rco-miR403b//aly-miR403a-3p//csi-miR403//tcc-miR403a//tcc-miR403b//bna-miR403//htu-miR403a//htu-miR403b//htu-miR403c//htu-miR403d//htu-miR403e//har-miR403a//hpe-miR403a//mdm-miR403a//mdm-miR403b//mes-miR403a//mes-miR403b//ptc-miR403d//aly-miR403b-3p//…	miRBASE2014	Variant	1	2.37548	2.37548	9	9	2.37548	1.00764	9	1.6	15	311.1	15	311.1	15	24	313.476	24	313.476	24
TGACAGAAGATAGAGAGCACTC	22	ath-miR157a-5p//ath-miR157b-5p//ath-miR157c-5p//ath-miR157d//gma-miR156d//gma-miR156e//gma-miR156c//ptc-miR156g//ptc-miR156h//ptc-miR156i//ptc-miR156j//mtr-miR156e//mtr-miR156f//mtr-miR156h-5p//gra-miR157a//gra-miR157b//smo-miR156b//bna-miR156b//bna-miR156c//vvi-miR156f//vvi-miR156g//vvi-miR156i//sly-miR156a//sly-miR156b//sly-miR156c//bra-miR157a//bol-miR157a//aqc-miR156b//aqc-miR156a//rco-miR156…	miRBASE2014	Variant	2	65.075	65.075	72	72	65.075	1.02752	72	1.63158	114	2364.36	114	2364.36	114	186	2429.44	186	2429.44	186
TGACAGAAGATAGAGAGCACC	21	ath-miR157a-5p//ath-miR157b-5p//ath-miR157c-5p//ath-miR157d//gma-miR156d//gma-miR156e//gma-miR156c//ptc-miR156g//ptc-miR156h//ptc-miR156i//ptc-miR156j//mtr-miR156e//mtr-miR156f//mtr-miR156h-5p//gra-miR157a//gra-miR157b//smo-miR156b//bna-miR156b//bna-miR156c//vvi-miR156f//vvi-miR156g//vvi-miR156i//sly-miR156a//sly-miR156b//sly-miR156c//bra-miR157a//bol-miR157a//aqc-miR156b//aqc-miR156a//rco-miR156…	miRBASE2014	Variant	1	381.1	381.1	319	319	381.1	1.03727	319	1.64706	493	10224.8	493	10224.8	493	812	10605.9	812	10605.9	812
CGACCTTAGCTCAGT	15	ptc-miR6478	miRBASE2014	Exact	0	47.0228	47.0228	23	23	47.0228	1.0687	23	1.69697	33	684.42	33	684.42	33	56	731.443	56	731.443	56
GAAGCTGCCAGCATGATCTGG	21	ath-miR167d//rco-miR167c//aly-miR167d-5p//cca-miR167//nta-miR167a//nta-miR167b//nta-miR167c	miRBASE2014	Exact	0	426.925	426.925	192	192	426.925	1.07596	192	1.70849	271	5620.54	271	5620.54	271	463	6047.47	463	6047.47	463
CCCAAATGTAGACAAAGCA	19	ath-miR158a-3p//ath-miR158b//aly-miR158a-3p	miRBASE2014	Exact	0	30033.8	30033.8	9030	9030	30033.8	1.12648	9030	1.78872	11449	237452	11449	237452	11449	20479	267486	20479	267486	20479
TAGATTCACGCACAAACTCG	20	ath-miR403-3p//ptc-miR403a//ptc-miR403b//ptc-miR403c-3p//vvi-miR403a//vvi-miR403b//vvi-miR403c//vvi-miR403d//vvi-miR403e//vvi-miR403f//rco-miR403a//rco-miR403b//aly-miR403a-3p//csi-miR403//tcc-miR403a//tcc-miR403b//bna-miR403//htu-miR403a//htu-miR403b//htu-miR403c//htu-miR403d//htu-miR403e//har-miR403a//hpe-miR403a//mdm-miR403a//mdm-miR403b//mes-miR403a//mes-miR403b//ptc-miR403d//aly-miR403b-3p//…	miRBASE2014	Exact	0	3506.54	3506.54	931	931	3506.54	1.15002	931	1.82609	1127	23374	1127	23374	1127	2058	26880.5	2058	26880.5	2058
CCCAAATGTAGACAAAGCT	19	ath-miR158a-3p//ath-miR158b//aly-miR158a-3p//aly-miR158b-3p	miRBASE2014	Variant	1	3616.34	3616.34	930	930	3616.34	1.15694	930	1.83708	1111	23042.1	1111	23042.1	1111	2041	26658.5	2041	26658.5	2041
CCCAAATGTAGACAAAGC	18	ath-miR158a-3p//ath-miR158b//aly-miR158a-3p//aly-miR158b-3p	miRBASE2014	Exact	0	1978.72	1978.72	476	476	1978.72	1.17284	476	1.86232	552	11448.5	552	11448.5	552	1028	13427.2	1028	13427.2	1028
TCCCAAATGTAGACAAAGCA	20	ath-miR158a-3p//aly-miR158a-3p	miRBASE2014	Exact	0	1593.28	1593.28	383	383	1593.28	1.17302	383	1.86261	444	9208.56	444	9208.56	444	827	10801.8	827	10801.8	827
TCCACAGCTTTCTTGAACTG	20	ath-miR396a-5p//osa-miR396a-5p//osa-miR396b-5p//sbi-miR396b//sbi-miR396a//sof-miR396//gma-miR396a-5p//zma-miR396b-5p//zma-miR396a-5p//ptc-miR396a//ptc-miR396b//mtr-miR396b-5p//ghr-miR396a//ghr-miR396b//vvi-miR396d//vvi-miR396c//lja-miR396//aqc-miR396a//aly-miR396a-5p//gma-miR396e//csi-miR396a//csi-miR396b//bgy-miR396a//bcy-miR396a//tcc-miR396a//tcc-miR396b//bdi-miR396d-5p//bdi-miR396c-5p//ssp-miR…	miRBASE2014	Exact	0	95.3895	95.3895	22	22	95.3895	1.18397	22	1.88	25	518.5	25	518.5	25	47	613.89	47	613.89	47
ATGGAAGAAATTGTAGTATT	20	ath-miR447a.2-3p	miRBASE2014	Exact	0	67.6829	67.6829	14	14	67.6829	1.21756	14	1.93333	15	311.1	15	311.1	15	29	378.783	29	378.783	29
AGCTTTCTTGAACTG	15	ath-miR396a-5p//osa-miR396a-5p//osa-miR396b-5p//sbi-miR396b//sbi-miR396a//sof-miR396//gma-miR396a-5p//zma-miR396b-5p//zma-miR396a-5p//ptc-miR396a//ptc-miR396b//mtr-miR396b-5p//ghr-miR396a//ghr-miR396b//vvi-miR396d//vvi-miR396c//lja-miR396//aqc-miR396a//aly-miR396a-5p//gma-miR396e//csi-miR396a//csi-miR396b//bgy-miR396a//bcy-miR396a//tcc-miR396a//tcc-miR396b//bdi-miR396d-5p//bdi-miR396c-5p//ssp-miR…	miRBASE2014	Exact	0	1975.79	1975.79	397	397	1975.79	1.22791	397	1.94976	418	8669.32	418	8669.32	418	815	10645.1	815	10645.1	815
CCCAAATGTAGACAAAGCAT	20	ath-miR158a-3p//ath-miR158b//aly-miR158a-3p	miRBASE2014	Variant	1	3518.48	3518.48	695	695	3518.48	1.23432	695	1.95994	724	15015.8	724	15015.8	724	1419	18534.2	1419	18534.2	1419
CCCAAATGTAGACAAAGCATC	21	ath-miR158a-3p//ath-miR158b//aly-miR158a-3p	miRBASE2014	Variant	2	434.516	434.516	85	85	434.516	1.23808	85	1.96591	88	1825.12	88	1825.12	88	173	2259.64	173	2259.64	173
CCCAAATGTAGACAAAGCATT	21	ath-miR158a-3p//ath-miR158b//aly-miR158a-3p	miRBASE2014	Variant	2	320.682	320.682	61	61	320.682	1.24939	61	1.98387	62	1285.88	62	1285.88	62	123	1606.56	123	1606.56	123
TGACAGAAGATAGAGAGCACTT	22	ath-miR157a-5p//ath-miR157b-5p//ath-miR157c-5p//ath-miR157d//gma-miR156d//gma-miR156e//gma-miR156c//ptc-miR156g//ptc-miR156h//ptc-miR156i//ptc-miR156j//mtr-miR156e//mtr-miR156f//mtr-miR156h-5p//gra-miR157a//gra-miR157b//smo-miR156b//bna-miR156b//bna-miR156c//vvi-miR156f//vvi-miR156g//vvi-miR156i//sly-miR156a//sly-miR156b//sly-miR156c//bra-miR157a//bol-miR157a//aqc-miR156b//aqc-miR156a//rco-miR156…	miRBASE2014	Variant	2	339.126	339.126	63	63	339.126	1.25954	63	2	63	1306.62	63	1306.62	63	126	1645.75	126	1645.75	126
TCGCTTGCAGAGAGAAATCAC	21	ath-miR173-5p//aly-miR173a-5p//aly-miR173b-5p	miRBASE2014	Exact	0	156.106	156.106	29	29	156.106	1.25954	29	2	29	601.46	29	601.46	29	58	757.566	58	757.566	58
GCGGGAAGCATTTGCACATG	20	ath-miR822-5p	miRBASE2014	Exact	0	96.8932	96.8932	18	18	96.8932	1.25954	18	2	18	373.32	18	373.32	18	36	470.213	36	470.213	36
CCGTCTTGTATCAACTGAAT	20	ath-miR168b-3p//aly-miR168b-3p	miRBASE2014	Exact	0	80.7444	80.7444	15	15	80.7444	1.25954	15	2	15	311.1	15	311.1	15	30	391.844	30	391.844	30
CCCAAATGTAGACAAAGCC	19	ath-miR158a-3p//ath-miR158b//aly-miR158a-3p//aly-miR158b-3p	miRBASE2014	Variant	1	222.997	222.997	40	40	222.997	1.27569	40	2.02564	39	808.86	39	808.86	39	79	1031.86	79	1031.86	79
TAGATTCACGCACAAACTC	19	ath-miR403-3p//ptc-miR403a//ptc-miR403b//ptc-miR403c-3p//vvi-miR403a//vvi-miR403b//vvi-miR403c//vvi-miR403d//vvi-miR403e//vvi-miR403f//rco-miR403a//rco-miR403b//aly-miR403a-3p//csi-miR403//tcc-miR403a//tcc-miR403b//bna-miR403//htu-miR403a//htu-miR403b//htu-miR403c//htu-miR403d//htu-miR403e//har-miR403a//hpe-miR403a//mdm-miR403a//mdm-miR403b//mes-miR403a//mes-miR403b//ptc-miR403d//aly-miR403b-3p//…	miRBASE2014	Exact	0	201.465	201.465	36	36	201.465	1.27754	36	2.02857	35	725.9	35	725.9	35	71	927.365	71	927.365	71
CCCAAATGTAGACAAAGCACT	21	ath-miR158a-3p//ath-miR158b//aly-miR158a-3p	miRBASE2014	Variant	2	429.053	429.053	74	74	429.053	1.29553	74	2.05714	70	1451.8	70	1451.8	70	144	1880.85	144	1880.85	144
TTGGATTGAAGGGAGCTCTA	20	ath-miR159a//osa-miR159f//gma-miR159a-3p//ptc-miR159a//ptc-miR159b//bna-miR159//vvi-miR159c//sly-miR159//bra-miR159a//mtr-miR159a//pvu-miR159a.1//rco-miR159//aly-miR159a-3p//ahy-miR159//csi-miR159//gma-miR159e-3p//mes-miR159a//nta-miR159//hbr-miR159a//htu-miR159a//cme-miR159a//mes-miR159b//ppe-miR159//cpa-miR159a//atr-miR159	miRBASE2014	Exact	0	14364.7	14364.7	2466	2466	14364.7	1.29802	2466	2.0611	2324	48199.8	2324	48199.8	2324	4790	62564.5	4790	62564.5	4790
TGACAGAAGATAGAGAGCACT	21	ath-miR157a-5p//ath-miR157b-5p//ath-miR157c-5p//ath-miR157d//gma-miR156d//gma-miR156e//gma-miR156c//ptc-miR156g//ptc-miR156h//ptc-miR156i//ptc-miR156j//mtr-miR156e//mtr-miR156f//mtr-miR156h-5p//gra-miR157a//gra-miR157b//smo-miR156b//bna-miR156b//bna-miR156c//vvi-miR156f//vvi-miR156g//vvi-miR156i//sly-miR156a//sly-miR156b//sly-miR156c//bra-miR157a//bol-miR157a//aqc-miR156b//aqc-miR156a//rco-miR156…	miRBASE2014	Variant	1	3726.66	3726.66	611	611	3726.66	1.32434	611	2.10289	554	11490	554	11490	554	1165	15216.6	1165	15216.6	1165
TCACGTCGGGTTCACCA	17	ppt-miR894//osa-miR5077	miRBASE2014	Variant	1	545.103	545.103	87	87	545.103	1.34133	87	2.12987	77	1596.98	77	1596.98	77	164	2142.08	164	2142.08	164
GACAGAAGAGAGTGAGCACT	20	gma-miR156q//gma-miR156s	miRBASE2014	Exact	0	269.86	269.86	43	43	269.86	1.34241	43	2.13158	38	788.12	38	788.12	38	81	1057.98	81	1057.98	81
GGTTGATATGAGAACACAC	19	ath-miR398b-5p//ath-miR398c-5p	miRBASE2014	Exact	0	106.867	106.867	17	17	106.867	1.34351	17	2.13333	15	311.1	15	311.1	15	32	417.967	32	417.967	32
TCGTTGTAGTATAGTGG	17	gma-miR6300	miRBASE2014	Exact	0	632.734	632.734	99	99	632.734	1.35474	99	2.15116	86	1783.64	86	1783.64	86	185	2416.37	185	2416.37	185
CTCTCTATACTTCTGTCACC	20	ath-miR157c-3p//aly-miR157c-3p	miRBASE2014	Exact	0	1528.36	1528.36	234	234	1528.36	1.37031	234	2.17588	199	4127.26	199	4127.26	199	433	5655.62	433	5655.62	433
TCGCAGGAGAGATAGCGCCA	20	ath-miR391-5p//aly-miR391-5p//bra-miR391-5p	miRBASE2014	Exact	0	154.522	154.522	23	23	154.522	1.39213	23	2.21053	19	394.06	19	394.06	19	42	548.582	42	548.582	42
CTTCTCATCGATGGTCTAGA	20	ath-miR824-3p//aly-miR824-3p	miRBASE2014	Exact	0	2296.3	2296.3	341	341	2296.3	1.39402	341	2.21352	281	5827.94	281	5827.94	281	622	8124.24	622	8124.24	622
TGGACTGAAGGGAGCTCCCT	20	ath-miR319a//ath-miR319b//vvi-miR319b//vvi-miR319c//vvi-miR319f//aqc-miR319//rco-miR319a//rco-miR319b//rco-miR319c//aly-miR319a-3p//aly-miR319b-3p//tae-miR319//gma-miR319h//gma-miR319j//gma-miR319k//gma-miR319m//aau-miR319//amg-miR319//vun-miR319a//cca-miR319//lus-miR319a//nta-miR319a//nta-miR319b//hbr-miR319//mdm-miR319a//mdm-miR319b//mes-miR319a//mes-miR319b//mes-miR319c//mes-miR319d//mes-miR31…	miRBASE2014	Exact	0	841.797	841.797	125	125	841.797	1.39406	125	2.21359	103	2136.22	103	2136.22	103	228	2978.02	228	2978.02	228
CCCAAATGTAGACAAAGCATA	21	ath-miR158a-3p//ath-miR158b//aly-miR158a-3p	miRBASE2014	Variant	2	149.139	149.139	22	22	149.139	1.39949	22	2.22222	18	373.32	18	373.32	18	40	522.459	40	522.459	40
CCCAAATGTAGACAAAGT	18	ath-miR158a-3p//ath-miR158b//aly-miR158a-3p//aly-miR158b-3p	miRBASE2014	Variant	1	258.302	258.302	38	38	258.302	1.40175	38	2.22581	31	642.94	31	642.94	31	69	901.242	69	901.242	69
TCGCAGGAGAGATAGCGCC	19	ath-miR391-5p//aly-miR391-5p//bra-miR391-5p	miRBASE2014	Exact	0	356.699	356.699	52	52	356.699	1.40949	52	2.2381	42	871.08	42	871.08	42	94	1227.78	94	1227.78	94
TGAGCCGTGCCAATATCACGT	21	ath-miR171b-3p//ath-miR171c-3p//ptc-miR171a-3p//ptc-miR171b//mtr-miR171f//smo-miR171b//bna-miR171a//bna-miR171b//bna-miR171c//bna-miR171d//bna-miR171e//gma-miR171a//sly-miR171b//bra-miR171a//bra-miR171b//bra-miR171c//bra-miR171d//bol-miR171a//rco-miR171a//rco-miR171b//aly-miR171b-3p//aly-miR171c-3p//tae-miR171b//gma-miR171i-3p//ssl-miR171a//lus-miR171i//mdm-miR171f//cme-miR171d//cme-miR171b//mes-…	miRBASE2014	Variant	1	132.99	132.99	19	19	132.99	1.42748	19	2.26667	15	311.1	15	311.1	15	34	444.09	34	444.09	34
GAAGCTGCCAGCATGATCTA	20	ath-miR167a-5p//ath-miR167b//osa-miR167a-5p//osa-miR167b//osa-miR167c-5p//zma-miR167a-5p//zma-miR167b-5p//zma-miR167d-5p//zma-miR167c-5p//sbi-miR167a//sbi-miR167b//gma-miR167a//gma-miR167b//ptc-miR167a//ptc-miR167b//ptc-miR167c//ptc-miR167d//mtr-miR167a//tae-miR167a//bna-miR167a//bna-miR167b//bna-miR167c//vvi-miR167b//vvi-miR167d//vvi-miR167e//sly-miR167a//gma-miR167d//bra-miR167a//bra-miR167b//b…	miRBASE2014	Exact	0	584.999	584.999	83	83	584.999	1.43394	83	2.27692	65	1348.1	65	1348.1	65	148	1933.1	148	1933.1	148
CCACTTCTGACACCA	15	bta-miR-2478	miRBASE2014	Exact	0	465.07	465.07	65	65	465.07	1.44848	65	2.3	50	1037	50	1037	50	115	1502.07	115	1502.07	115
TGGCATTCTGTCCACCTCC	19	ath-miR394a//ath-miR394b-5p//osa-miR394//sbi-miR394a//zma-miR394a-5p//zma-miR394b-5p//ptc-miR394a-5p//ptc-miR394b-5p//vvi-miR394a//vvi-miR394b//vvi-miR394c//sbi-miR394b//ghr-miR394b//ghr-miR394a//aly-miR394a-5p//aly-miR394b-5p//ahy-miR394//gma-miR394b-5p//gma-miR394a-5p//csi-miR394//tcc-miR394a//tcc-miR394b//gma-miR394c-5p//bdi-miR394//ssl-miR394//gma-miR394d//gma-miR394e//gma-miR394f//bna-miR394…	miRBASE2014	Exact	0	151.435	151.435	21	21	151.435	1.45635	21	2.3125	16	331.84	16	331.84	16	37	483.275	37	483.275	37
TGAAGAGGACTTGGAACTTCGAT	23	ath-miR163	miRBASE2014	Exact	0	454.304	454.304	63	63	454.304	1.45635	63	2.3125	48	995.52	48	995.52	48	111	1449.82	111	1449.82	111
TTGGATTGAAGGGAGCTCT	19	ath-miR159a//ath-miR159b-3p//osa-miR159a.1//osa-miR159b//osa-miR159f//sbi-miR159a//sof-miR159a//sof-miR159b//sof-miR159d//gma-miR159a-3p//zma-miR159a-3p//zma-miR159b-3p//ptc-miR159a//ptc-miR159b//tae-miR159a//tae-miR159b//bna-miR159//vvi-miR159c//sly-miR159//bra-miR159a//mtr-miR159a//pvu-miR159a.1//zma-miR159f-3p//zma-miR159j-3p//zma-miR159k-3p//rco-miR159//aly-miR159a-3p//aly-miR159b-3p//ahy-miR…	miRBASE2014	Exact	0	840.925	840.925	112	112	840.925	1.50057	112	2.38272	81	1679.94	81	1679.94	81	193	2520.87	193	2520.87	193
TAGATTCACGCACAAACTCGT	21	ath-miR403-3p//ptc-miR403a//ptc-miR403b//ptc-miR403c-3p//vvi-miR403a//vvi-miR403b//vvi-miR403c//vvi-miR403d//vvi-miR403e//vvi-miR403f//rco-miR403a//rco-miR403b//aly-miR403a-3p//csi-miR403//tcc-miR403a//tcc-miR403b//bna-miR403//htu-miR403a//htu-miR403b//htu-miR403c//htu-miR403d//htu-miR403e//har-miR403a//hpe-miR403a//mdm-miR403a//mdm-miR403b//mes-miR403a//mes-miR403b//ptc-miR403d//aly-miR403b-3p//…	miRBASE2014	Variant	1	1903.18	1903.18	248	248	1903.18	1.52738	248	2.42529	174	3608.76	174	3608.76	174	422	5511.94	422	5511.94	422
GTGTTCTCAGGTCACCCCTG	20	ath-miR398b-3p//ath-miR398c-3p//aly-miR398b-3p//bra-miR398-3p	miRBASE2014	Exact	0	12998.7	12998.7	1693	1693	12998.7	1.52801	1693	2.42628	1187	24618.4	1187	24618.4	1187	2880	37617.1	2880	37617.1	2880
CAATGCATTGAAAGTGACTA	20	ath-miR161.2//aly-miR161-5p.2	miRBASE2014	Exact	0	598.772	598.772	77	77	598.772	1.54472	77	2.45283	53	1099.22	53	1099.22	53	130	1697.99	130	1697.99	130
TGAAAGTGACTACATCGGGG	20	ath-miR161.1//aly-miR161-5p.1	miRBASE2014	Exact	0	974.628	974.628	124	124	974.628	1.55944	124	2.47619	84	1742.16	84	1742.16	84	208	2716.79	208	2716.79	208
CAAGTTGACCTTGGCTCTGC	20	ath-miR169f-3p//aly-miR169f-3p	miRBASE2014	Exact	0	505.758	505.758	64	64	505.758	1.56711	64	2.48837	43	891.82	43	891.82	43	107	1397.58	107	1397.58	107
CCCACTTCTGACACCA	16	bta-miR-2478	miRBASE2014	Exact	0	375.855	375.855	47	47	375.855	1.58459	47	2.51613	31	642.94	31	642.94	31	78	1018.8	78	1018.8	78
CAATGCATTGAAAGTGACT	19	ath-miR161.2//aly-miR161-5p.2	miRBASE2014	Exact	0	3087.51	3087.51	381	381	3087.51	1.60515	381	2.54878	246	5102.04	246	5102.04	246	627	8189.55	627	8189.55	627
CCCAAATGTAGACAAAGCAAT	21	ath-miR158a-3p//ath-miR158b//aly-miR158a-3p	miRBASE2014	Variant	2	269.78	269.78	33	33	269.78	1.61941	33	2.57143	21	435.54	21	435.54	21	54	705.32	54	705.32	54
TGAATTGAAGTGCTTGAATT	20	ath-miR846-3p//aly-miR846-3p	miRBASE2014	Exact	0	319.73	319.73	38	38	319.73	1.67027	38	2.65217	23	477.02	23	477.02	23	61	796.75	61	796.75	61
GAAAGTGACTACATCGGGGT	20	ath-miR161.1	miRBASE2014	Exact	0	1095.98	1095.98	128	128	1095.98	1.70458	128	2.70667	75	1555.5	75	1555.5	75	203	2651.48	203	2651.48	203
TCATGCGATCTCTTTGGATT	20	ath-miR393b-3p//aly-miR393b-3p	miRBASE2014	Exact	0	1255.81	1255.81	142	142	1255.81	1.77628	142	2.82051	78	1617.72	78	1617.72	78	220	2873.53	220	2873.53	220
CTCTCTATACTTCTGTCACCC	21	ath-miR157c-3p//aly-miR157c-3p	miRBASE2014	Variant	1	282.05	282.05	31	31	282.05	1.84996	31	2.9375	16	331.84	16	331.84	16	47	613.89	47	613.89	47
TGACAGAAGATAGAGAGCACCT	22	ath-miR157a-5p//ath-miR157b-5p//ath-miR157c-5p//ath-miR157d//gma-miR156d//gma-miR156e//gma-miR156c//ptc-miR156g//ptc-miR156h//ptc-miR156i//ptc-miR156j//mtr-miR156e//mtr-miR156f//mtr-miR156h-5p//gra-miR157a//gra-miR157b//smo-miR156b//bna-miR156b//bna-miR156c//vvi-miR156f//vvi-miR156g//vvi-miR156i//sly-miR156a//sly-miR156b//sly-miR156c//bra-miR157a//bol-miR157a//aqc-miR156b//aqc-miR156a//rco-miR156…	miRBASE2014	Variant	2	756.222	756.222	82	82	756.222	1.88932	82	3	41	850.34	41	850.34	41	123	1606.56	123	1606.56	123
CTCTCTATACTTCTGTCACCT	21	ath-miR157c-3p//aly-miR157c-3p	miRBASE2014	Variant	1	1912.84	1912.84	207	207	1912.84	1.89543	207	3.00971	103	2136.22	103	2136.22	103	310	4049.06	310	4049.06	310
TGGACTGAAGGGAGCTCCCTT	21	ath-miR319a//ath-miR319b//vvi-miR319b//vvi-miR319c//vvi-miR319f//aqc-miR319//rco-miR319a//rco-miR319b//rco-miR319c//aly-miR319a-3p//aly-miR319b-3p//tae-miR319//gma-miR319h//gma-miR319j//gma-miR319k//gma-miR319m//aau-miR319//amg-miR319//vun-miR319a//cca-miR319//lus-miR319a//nta-miR319a//nta-miR319b//hbr-miR319//mdm-miR319a//mdm-miR319b//mes-miR319a//mes-miR319b//mes-miR319c//mes-miR319d//mes-miR31…	miRBASE2014	Variant	1	797.702	797.702	84	84	797.702	1.98621	84	3.15385	39	808.86	39	808.86	39	123	1606.56	123	1606.56	123
CAGCTTTCTTGAACTG	16	ath-miR396a-5p//osa-miR396a-5p//osa-miR396b-5p//sbi-miR396b//sbi-miR396a//sof-miR396//gma-miR396a-5p//zma-miR396b-5p//zma-miR396a-5p//ptc-miR396a//ptc-miR396b//mtr-miR396b-5p//ghr-miR396a//ghr-miR396b//vvi-miR396d//vvi-miR396c//lja-miR396//aqc-miR396a//aly-miR396a-5p//gma-miR396e//csi-miR396a//csi-miR396b//bgy-miR396a//bcy-miR396a//tcc-miR396a//tcc-miR396b//bdi-miR396d-5p//bdi-miR396c-5p//ssp-miR…	miRBASE2014	Exact	0	1350.24	1350.24	141	141	1350.24	2.01724	141	3.20312	64	1327.36	64	1327.36	64	205	2677.6	205	2677.6	205
GGTTGATATGAGAACACACG	20	ath-miR398b-5p//ath-miR398c-5p	miRBASE2014	Variant	1	1627.62	1627.62	164	164	1627.62	2.1713	164	3.44776	67	1389.58	67	1389.58	67	231	3017.2	231	3017.2	231
CGACCTTAGCTCAGTTGGT	19	ptc-miR6478	miRBASE2014	Exact	0	1778.98	1778.98	175	175	1778.98	2.29962	175	3.65152	66	1368.84	66	1368.84	66	241	3147.82	241	3147.82	241
GACAGAAGATAGAGAGCACT	20	ath-miR157a-5p//ath-miR157b-5p//ath-miR157c-5p//ath-miR157d//gma-miR156d//gma-miR156e//gma-miR156c//ptc-miR156g//ptc-miR156h//ptc-miR156i//ptc-miR156j//mtr-miR156e//mtr-miR156f//mtr-miR156h-5p//gra-miR157a//gra-miR157b//smo-miR156b//bna-miR156b//bna-miR156c//vvi-miR156f//vvi-miR156g//vvi-miR156i//sly-miR156a//sly-miR156b//sly-miR156c//bra-miR157a//bol-miR157a//aqc-miR156b//aqc-miR156a//rco-miR156…	miRBASE2014	Variant	1	485.65	485.65	46	46	485.65	2.56107	46	4.06667	15	311.1	15	311.1	15	61	796.75	61	796.75	61
GGTTGATATGAGAACACA	18	ath-miR398b-5p//ath-miR398c-5p	miRBASE2014	Exact	0	606.291	606.291	57	57	606.291	2.62405	57	4.16667	18	373.32	18	373.32	18	75	979.611	75	979.611	75
CGACCTTAGCTCAGTTGG	18	ptc-miR6478	miRBASE2014	Exact	0	676.981	676.981	63	63	676.981	2.71796	63	4.31579	19	394.06	19	394.06	19	82	1071.04	82	1071.04	82
TTCAATAAAGCTGTGGGAAG	20	ath-miR396a-3p//gma-miR396a-3p//mtr-miR396b-3p//aly-miR396a-3p//gma-miR396i-3p//sly-miR396a-3p	miRBASE2014	Exact	0	868.312	868.312	80	80	868.312	2.82028	80	4.47826	23	477.02	23	477.02	23	103	1345.33	103	1345.33	103
CAAGTTGACCTTGGCTCTGT	20	aly-miR169d-3p//aly-miR169e-3p//aly-miR169g-3p	miRBASE2014	Exact	0	287.353	287.353	22	22	287.353	#DIV/0!	22	#DIV/0!	0	0	0	0	0	22	287.353	22	287.353	22
CAAGTTGACTTTGGCTCTGT	20	aly-miR169d-3p//aly-miR169e-3p//aly-miR169g-3p	miRBASE2014	Variant	1	248.168	248.168	19	19	248.168	#DIV/0!	19	#DIV/0!	0	0	0	0	0	19	248.168	19	248.168	19
TTCCCTTTAACGCTTCATTG	20	aly-miR395b-5p//aly-miR395c-5p	miRBASE2014	Exact	0	235.107	235.107	18	18	235.107	#DIV/0!	18	#DIV/0!	0	0	0	0	0	18	235.107	18	235.107	18
ATCACAGCCGTTTTTGACAATT	22	ame-miR-13b	miRBASE2014	Variant	2	444.09	444.09	34	34	444.09	#DIV/0!	34	#DIV/0!	0	0	0	0	0	34	444.09	34	444.09	34
ATGGCACTGAAAGAATTCACGG	22	api-miR-263a	miRBASE2014	Exact	0	300.414	300.414	23	23	300.414	#DIV/0!	23	#DIV/0!	0	0	0	0	0	23	300.414	23	300.414	23
ATGGCACTGAAAGAATTCACGGG	23	api-miR-263a	miRBASE2014	Exact	0	391.844	391.844	30	30	391.844	#DIV/0!	30	#DIV/0!	0	0	0	0	0	30	391.844	30	391.844	30
GAGATCTTGATAAACTCGCC	20	api-miR-3050	miRBASE2014	Exact	0	300.414	300.414	23	23	300.414	#DIV/0!	23	#DIV/0!	0	0	0	0	0	23	300.414	23	300.414	23
GAGATCTTGATAAACTCGCCT	21	api-miR-3050	miRBASE2014	Exact	0	17711.4	17711.4	1356	1356	17711.4	#DIV/0!	1356	#DIV/0!	0	0	0	0	0	1356	17711.4	1356	17711.4	1356
AATACTGTCAGGTAATGATGTCT	23	api-miR-8	miRBASE2014	Variant	1	640.013	640.013	49	49	640.013	#DIV/0!	49	#DIV/0!	0	0	0	0	0	49	640.013	49	640.013	49
AATACTGTCAGGTAATGATG	20	api-miR-8//hco-miR-236	miRBASE2014	Exact	0	326.537	326.537	25	25	326.537	#DIV/0!	25	#DIV/0!	0	0	0	0	0	25	326.537	25	326.537	25
AGCACCATGGAATTCAGCTG	20	api-miR-998	miRBASE2014	Exact	0	574.705	574.705	44	44	574.705	#DIV/0!	44	#DIV/0!	0	0	0	0	0	44	574.705	44	574.705	44
ACAGAAGATAGAGAGC	16	ath-miR157a-5p//ath-miR157b-5p//ath-miR157c-5p//ath-miR157d//gma-miR156d//gma-miR156e//gma-miR156c//ptc-miR156g//ptc-miR156h//ptc-miR156i//ptc-miR156j//mtr-miR156e//mtr-miR156f//mtr-miR156h-5p//gra-miR157a//gra-miR157b//smo-miR156b//bna-miR156b//bna-miR156c//vvi-miR156f//vvi-miR156g//vvi-miR156i//sly-miR156a//sly-miR156b//sly-miR156c//bra-miR157a//bol-miR157a//aqc-miR156b//aqc-miR156a//rco-miR156…	miRBASE2014	Exact	0	331.84	331.84	16	16	-331.84	#DIV/0!	-16	#DIV/0!	16	331.84	16	331.84	16	0	0	0	0	0
TGACAGAAGATAGAGAGC	18	ath-miR157a-5p//ath-miR157b-5p//ath-miR157c-5p//ath-miR157d//gma-miR156d//gma-miR156e//gma-miR156c//ptc-miR156g//ptc-miR156h//ptc-miR156i//ptc-miR156j//mtr-miR156e//mtr-miR156f//mtr-miR156h-5p//gra-miR157a//gra-miR157b//smo-miR156b//bna-miR156b//bna-miR156c//vvi-miR156f//vvi-miR156g//vvi-miR156i//sly-miR156a//sly-miR156b//sly-miR156c//bra-miR157a//bol-miR157a//aqc-miR156b//aqc-miR156a//rco-miR156…	miRBASE2014	Exact	0	326.537	326.537	25	25	326.537	#DIV/0!	25	#DIV/0!	0	0	0	0	0	25	326.537	25	326.537	25
TGACAGAAGATAGAGAGCA	19	ath-miR157a-5p//ath-miR157b-5p//ath-miR157c-5p//ath-miR157d//gma-miR156d//gma-miR156e//gma-miR156c//ptc-miR156g//ptc-miR156h//ptc-miR156i//ptc-miR156j//mtr-miR156e//mtr-miR156f//mtr-miR156h-5p//gra-miR157a//gra-miR157b//smo-miR156b//bna-miR156b//bna-miR156c//vvi-miR156f//vvi-miR156g//vvi-miR156i//sly-miR156a//sly-miR156b//sly-miR156c//bra-miR157a//bol-miR157a//aqc-miR156b//aqc-miR156a//rco-miR156…	miRBASE2014	Exact	0	274.291	274.291	21	21	274.291	#DIV/0!	21	#DIV/0!	0	0	0	0	0	21	274.291	21	274.291	21
TCCCAAATGTAGACAAAGCAT	21	ath-miR158a-3p//aly-miR158a-3p	miRBASE2014	Variant	1	248.168	248.168	19	19	248.168	#DIV/0!	19	#DIV/0!	0	0	0	0	0	19	248.168	19	248.168	19
TCCCAAATGTAGACAAAGC	19	ath-miR158a-3p//aly-miR158a-3p//aly-miR158b-3p	miRBASE2014	Exact	0	248.168	248.168	19	19	248.168	#DIV/0!	19	#DIV/0!	0	0	0	0	0	19	248.168	19	248.168	19
TCCCAAATGTAGACAAAGCT	20	ath-miR158a-3p//aly-miR158a-3p//aly-miR158b-3p	miRBASE2014	Variant	1	326.537	326.537	25	25	326.537	#DIV/0!	25	#DIV/0!	0	0	0	0	0	25	326.537	25	326.537	25
TCCCAAATGTAGACAAAGCTT	21	ath-miR158a-3p//aly-miR158a-3p//aly-miR158b-3p	miRBASE2014	Variant	2	326.537	326.537	25	25	326.537	#DIV/0!	25	#DIV/0!	0	0	0	0	0	25	326.537	25	326.537	25
CCCAAATGTAGACAAAGCAA	20	ath-miR158a-3p//ath-miR158b//aly-miR158a-3p	miRBASE2014	Variant	1	300.414	300.414	23	23	300.414	#DIV/0!	23	#DIV/0!	0	0	0	0	0	23	300.414	23	300.414	23
CCCAAATGTAGACAAAG	17	ath-miR158a-3p//ath-miR158b//aly-miR158a-3p//aly-miR158b-3p	miRBASE2014	Exact	0	313.476	313.476	24	24	313.476	#DIV/0!	24	#DIV/0!	0	0	0	0	0	24	313.476	24	313.476	24
CAAATGTAGACAAAGCA	17	ath-miR158a-3p//ath-miR158b//aly-miR158a-3p//bra-miR158-3p	miRBASE2014	Exact	0	235.107	235.107	18	18	235.107	#DIV/0!	18	#DIV/0!	0	0	0	0	0	18	235.107	18	235.107	18
TTGGATTGAAGGGAGC	16	ath-miR159a//ath-miR159b-3p//ath-miR159c//osa-miR159a.1//osa-miR159b//osa-miR159c//osa-miR159d//osa-miR159e//osa-miR159f//sbi-miR159a//sof-miR159a//sof-miR159b//sof-miR159d//sof-miR159c//gma-miR159a-3p//zma-miR159a-3p//zma-miR159b-3p//zma-miR159c-3p//zma-miR159d-3p//sbi-miR159b//ptc-miR159a//ptc-miR159b//ptc-miR159d//pta-miR159a//pta-miR159c//smo-miR159//tae-miR159a//tae-miR159b//bna-miR159//vvi-…	miRBASE2014	Exact	0	404.906	404.906	31	31	404.906	#DIV/0!	31	#DIV/0!	0	0	0	0	0	31	404.906	31	404.906	31
TTGGATTGAAGGGAGCT	17	ath-miR159a//ath-miR159b-3p//ath-miR159c//osa-miR159a.1//osa-miR159b//osa-miR159c//osa-miR159d//osa-miR159e//osa-miR159f//sbi-miR159a//sof-miR159a//sof-miR159b//sof-miR159d//sof-miR159c//gma-miR159a-3p//zma-miR159a-3p//zma-miR159b-3p//zma-miR159c-3p//zma-miR159d-3p//sbi-miR159b//ptc-miR159a//ptc-miR159b//ptc-miR159d//pta-miR159a//pta-miR159c//smo-miR159//tae-miR159a//tae-miR159b//bna-miR159//vvi-…	miRBASE2014	Exact	0	561.644	561.644	43	43	561.644	#DIV/0!	43	#DIV/0!	0	0	0	0	0	43	561.644	43	561.644	43
TTGGATTGAAGGGAGCTC	18	ath-miR159a//ath-miR159b-3p//ath-miR159c//osa-miR159a.1//osa-miR159b//osa-miR159c//osa-miR159d//osa-miR159e//osa-miR159f//sbi-miR159a//sof-miR159a//sof-miR159b//sof-miR159d//sof-miR159c//gma-miR159a-3p//zma-miR159a-3p//zma-miR159b-3p//zma-miR159c-3p//zma-miR159d-3p//sbi-miR159b//ptc-miR159a//ptc-miR159b//ptc-miR159d//pta-miR159a//pta-miR159c//smo-miR159//tae-miR159a//tae-miR159b//bna-miR159//vvi-…	miRBASE2014	Exact	0	522.459	522.459	40	40	522.459	#DIV/0!	40	#DIV/0!	0	0	0	0	0	40	522.459	40	522.459	40
TTGGATTGAAGGGAGCTCTTC	21	ath-miR159b-3p//aly-miR159b-3p//lus-miR159c	miRBASE2014	Variant	1	535.521	535.521	41	41	535.521	#DIV/0!	41	#DIV/0!	0	0	0	0	0	41	535.521	41	535.521	41
TTGGATTGAAGGGAGCTCTTT	21	ath-miR159b-3p//aly-miR159b-3p//lus-miR159c	miRBASE2014	Variant	1	222.045	222.045	17	17	222.045	#DIV/0!	17	#DIV/0!	0	0	0	0	0	17	222.045	17	222.045	17
CGTACAAGGAGTCAAGCATG	20	ath-miR160c-3p	miRBASE2014	Exact	0	235.107	235.107	18	18	235.107	#DIV/0!	18	#DIV/0!	0	0	0	0	0	18	235.107	18	235.107	18
GAAAGTGACTACATCGGGGTT	21	ath-miR161.1	miRBASE2014	Variant	1	195.922	195.922	15	15	195.922	#DIV/0!	15	#DIV/0!	0	0	0	0	0	15	195.922	15	195.922	15
CAATGCATTGAAAGTGACTT	20	ath-miR161.2//aly-miR161-5p.2	miRBASE2014	Variant	1	274.291	274.291	21	21	274.291	#DIV/0!	21	#DIV/0!	0	0	0	0	0	21	274.291	21	274.291	21
CGATAAACCTCTGCATCCAGT	21	ath-miR162a-3p//ath-miR162b-3p//osa-miR162a//mtr-miR162//ptc-miR162a//ptc-miR162b//ghr-miR162a//cpa-miR162a//vvi-miR162//sly-miR162//sbi-miR162//csi-miR162-3p//rco-miR162//aly-miR162a-3p//aly-miR162b-3p//tcc-miR162//gma-miR162b//gma-miR162c//aau-miR162//vun-miR162//lus-miR162a//lus-miR162b//nta-miR162a//nta-miR162b//pde-miR162//htu-miR162a//hpe-miR162a//mdm-miR162a//mdm-miR162b//cme-miR162//mes-m…	miRBASE2014	Variant	1	339.598	339.598	26	26	339.598	#DIV/0!	26	#DIV/0!	0	0	0	0	0	26	339.598	26	339.598	26
CGGACCAGGCTTCATCCCCA	20	ath-miR165a-3p//ath-miR165b//aly-miR165a-3p//aly-miR165b-3p//bna-miR166f//lus-miR166b	miRBASE2014	Variant	1	435.54	435.54	21	21	-435.54	#DIV/0!	-21	#DIV/0!	21	435.54	21	435.54	21	0	0	0	0	0
CGGACCAGGCTTCATCCCCCC	21	ath-miR165a-3p//ath-miR165b//ctr-miR166//csi-miR166a//bna-miR166f//lus-miR166b//lus-miR166i//hbr-miR166b//lus-miR166k	miRBASE2014	Variant	1	352.58	352.58	17	17	-352.58	#DIV/0!	-17	#DIV/0!	17	352.58	17	352.58	17	0	0	0	0	0
GACTGTTGTCTGGCTCGAGGA	21	ath-miR166a-5p//ath-miR166b-5p//aly-miR166b-5p	miRBASE2014	Variant	1	435.54	435.54	21	21	-435.54	#DIV/0!	-21	#DIV/0!	21	435.54	21	435.54	21	0	0	0	0	0
CCCGTCTTGTATCAACTGA	19	ath-miR168b-3p//aly-miR168b-3p	miRBASE2014	Exact	0	261.23	261.23	20	20	261.23	#DIV/0!	20	#DIV/0!	0	0	0	0	0	20	261.23	20	261.23	20
CCGTCTTGTATCAACTGA	18	ath-miR168b-3p//aly-miR168b-3p	miRBASE2014	Exact	0	222.045	222.045	17	17	222.045	#DIV/0!	17	#DIV/0!	0	0	0	0	0	17	222.045	17	222.045	17
CAAGTTGACCTTGGCTCTG	19	ath-miR169f-3p//aly-miR169d-3p//aly-miR169e-3p//aly-miR169f-3p//aly-miR169g-3p	miRBASE2014	Exact	0	640.013	640.013	49	49	640.013	#DIV/0!	49	#DIV/0!	0	0	0	0	0	49	640.013	49	640.013	49
ATTGGCCTGGTTCACTCAGA	20	ath-miR170-5p//ath-miR171a-5p//aly-miR170-5p//aly-miR171a-5p//gma-miR171j-5p//stu-miR171a-5p//stu-miR171c-5p	miRBASE2014	Exact	0	274.291	274.291	21	21	274.291	#DIV/0!	21	#DIV/0!	0	0	0	0	0	21	274.291	21	274.291	21
GATTGAGCCGCGCCAATATC	20	ath-miR171a-3p//osa-miR171a//ptc-miR171c//ptc-miR171d//ptc-miR171k//mtr-miR171e-3p//bna-miR171g//bna-miR171f//vvi-miR171e//bra-miR171e//sbi-miR171g//sbi-miR171j//bdi-miR171a//zma-miR171n-3p//ccl-miR171//rco-miR171g//aly-miR171a-3p//tcc-miR171a//tcc-miR171b//tcc-miR171c//lus-miR171a//lus-miR171f//mdm-miR171c//mdm-miR171d//mdm-miR171e//cme-miR171e//cme-miR171a//cme-miR171g//mes-miR171e//mes-miR171f…	miRBASE2014	Exact	0	261.23	261.23	20	20	261.23	#DIV/0!	20	#DIV/0!	0	0	0	0	0	20	261.23	20	261.23	20
GATATTAGTGCGGTTCAATC	20	ath-miR171b-5p//aly-miR171b-5p	miRBASE2014	Exact	0	444.09	444.09	34	34	444.09	#DIV/0!	34	#DIV/0!	0	0	0	0	0	34	444.09	34	444.09	34
GAATCTTGATGATGCTGCAT	20	ath-miR172a//ath-miR172b-3p//ath-miR172e-3p//osa-miR172a//osa-miR172b//osa-miR172d-3p//gma-miR172a//gma-miR172b-3p//zma-miR172e//ptc-miR172a//ptc-miR172b-3p//ptc-miR172c//ptc-miR172d//ptc-miR172e//ptc-miR172f//vvi-miR172d//sly-miR172a//sly-miR172b//bra-miR172a//bra-miR172b-3p//bol-miR172a//bol-miR172b//aqc-miR172a//aqc-miR172b//aly-miR172a-3p//aly-miR172b-3p//aly-miR172e-3p//tcc-miR172b//tcc-miR1…	miRBASE2014	Exact	0	195.922	195.922	15	15	195.922	#DIV/0!	15	#DIV/0!	0	0	0	0	0	15	195.922	15	195.922	15
GAGATGAAATCTTTGATTGG	20	ath-miR1886.2	miRBASE2014	Exact	0	195.922	195.922	15	15	195.922	#DIV/0!	15	#DIV/0!	0	0	0	0	0	15	195.922	15	195.922	15
TTGGACTGAAGGGAGCTCCCT	21	ath-miR319a//ath-miR319b//vvi-miR319b//vvi-miR319c//vvi-miR319f//aqc-miR319//rco-miR319a//rco-miR319b//rco-miR319c//aly-miR319a-3p//aly-miR319b-3p//tae-miR319//gma-miR319h//gma-miR319j//gma-miR319k//gma-miR319m//aau-miR319//amg-miR319//vun-miR319a//cca-miR319//lus-miR319a//nta-miR319a//nta-miR319b//hbr-miR319//mdm-miR319a//mdm-miR319b//mes-miR319a//mes-miR319b//mes-miR319c//mes-miR319d//mes-miR31…	miRBASE2014	Exact	0	222.045	222.045	17	17	222.045	#DIV/0!	17	#DIV/0!	0	0	0	0	0	17	222.045	17	222.045	17
TCGCAGGAGAGATAGCGCCT	20	ath-miR391-5p//aly-miR391-5p//bra-miR391-5p	miRBASE2014	Variant	1	561.644	561.644	43	43	561.644	#DIV/0!	43	#DIV/0!	0	0	0	0	0	43	561.644	43	561.644	43
TCATGCGATCTCTTTGGAT	19	ath-miR393b-3p//aly-miR393b-3p	miRBASE2014	Exact	0	535.521	535.521	41	41	535.521	#DIV/0!	41	#DIV/0!	0	0	0	0	0	41	535.521	41	535.521	41
TGCGATCTCTTTGGATT	17	ath-miR393b-3p//aly-miR393b-3p	miRBASE2014	Exact	0	287.353	287.353	22	22	287.353	#DIV/0!	22	#DIV/0!	0	0	0	0	0	22	287.353	22	287.353	22
TTGGCATTCTGTCCACCTCC	20	ath-miR394a//ath-miR394b-5p//osa-miR394//sbi-miR394a//zma-miR394a-5p//zma-miR394b-5p//ptc-miR394a-5p//ptc-miR394b-5p//vvi-miR394a//vvi-miR394b//vvi-miR394c//sbi-miR394b//ghr-miR394b//ghr-miR394a//aly-miR394a-5p//aly-miR394b-5p//ahy-miR394//gma-miR394b-5p//gma-miR394a-5p//csi-miR394//tcc-miR394a//tcc-miR394b//gma-miR394c-5p//bdi-miR394//ssl-miR394//gma-miR394d//gma-miR394e//gma-miR394f//bna-miR394…	miRBASE2014	Exact	0	208.984	208.984	16	16	208.984	#DIV/0!	16	#DIV/0!	0	0	0	0	0	16	208.984	16	208.984	16
TTCAATAAAGCTGTGGGA	18	ath-miR396a-3p//osa-miR396a-3p//osa-miR396b-3p//gma-miR396a-3p//zma-miR396b-3p//zma-miR396a-3p//mtr-miR396b-3p//aly-miR396a-3p//bdi-miR396d-3p//bdi-miR396c-3p//gma-miR396i-3p//sly-miR396a-3p//ata-miR396e-3p	miRBASE2014	Exact	0	496.336	496.336	38	38	496.336	#DIV/0!	38	#DIV/0!	0	0	0	0	0	38	496.336	38	496.336	38
TTCAATAAAGCTGTGGGAA	19	ath-miR396a-3p//osa-miR396a-3p//osa-miR396b-3p//gma-miR396a-3p//zma-miR396b-3p//zma-miR396a-3p//mtr-miR396b-3p//aly-miR396a-3p//bdi-miR396d-3p//bdi-miR396c-3p//gma-miR396i-3p//sly-miR396a-3p//ata-miR396e-3p	miRBASE2014	Exact	0	195.922	195.922	15	15	195.922	#DIV/0!	15	#DIV/0!	0	0	0	0	0	15	195.922	15	195.922	15
ACAGCTTTCTTGAACTG	17	ath-miR396a-5p//osa-miR396a-5p//osa-miR396b-5p//sbi-miR396b//sbi-miR396a//sof-miR396//gma-miR396a-5p//zma-miR396b-5p//zma-miR396a-5p//ptc-miR396a//ptc-miR396b//mtr-miR396b-5p//ghr-miR396a//ghr-miR396b//vvi-miR396d//vvi-miR396c//lja-miR396//aqc-miR396a//aly-miR396a-5p//gma-miR396e//csi-miR396a//csi-miR396b//bgy-miR396a//bcy-miR396a//tcc-miR396a//tcc-miR396b//bdi-miR396d-5p//bdi-miR396c-5p//ssp-miR…	miRBASE2014	Exact	0	222.045	222.045	17	17	222.045	#DIV/0!	17	#DIV/0!	0	0	0	0	0	17	222.045	17	222.045	17
CACAGCTTTCTTGAACTGC	19	ath-miR396a-5p//osa-miR396a-5p//osa-miR396b-5p//sbi-miR396b//sbi-miR396a//sof-miR396//gma-miR396a-5p//zma-miR396b-5p//zma-miR396a-5p//ptc-miR396a//ptc-miR396b//mtr-miR396b-5p//ghr-miR396a//ghr-miR396b//vvi-miR396d//vvi-miR396c//lja-miR396//aqc-miR396a//aly-miR396a-5p//gma-miR396e//csi-miR396a//csi-miR396b//bgy-miR396a//bcy-miR396a//tcc-miR396a//tcc-miR396b//bdi-miR396d-5p//bdi-miR396c-5p//ssp-miR…	miRBASE2014	Variant	1	235.107	235.107	18	18	235.107	#DIV/0!	18	#DIV/0!	0	0	0	0	0	18	235.107	18	235.107	18
TACACAGCTTTCTTGAACTG	20	ath-miR396a-5p//osa-miR396a-5p//osa-miR396b-5p//sbi-miR396b//sbi-miR396a//sof-miR396//gma-miR396a-5p//zma-miR396b-5p//zma-miR396a-5p//ptc-miR396a//ptc-miR396b//mtr-miR396b-5p//ghr-miR396a//ghr-miR396b//vvi-miR396d//vvi-miR396c//lja-miR396//aqc-miR396a//aly-miR396a-5p//gma-miR396e//csi-miR396a//csi-miR396b//bgy-miR396a//bcy-miR396a//tcc-miR396a//tcc-miR396b//bdi-miR396d-5p//bdi-miR396c-5p//ssp-miR…	miRBASE2014	Variant	1	373.32	373.32	18	18	-373.32	#DIV/0!	-18	#DIV/0!	18	373.32	18	373.32	18	0	0	0	0	0
CTCAAGAAAGCTGTGGGAAA	20	ath-miR396b-3p//aly-miR396b-3p//bra-miR396-3p	miRBASE2014	Exact	0	431.029	431.029	33	33	431.029	#DIV/0!	33	#DIV/0!	0	0	0	0	0	33	431.029	33	431.029	33
TCCACAGCTTTCTTGAACTT	20	ath-miR396b-5p//osa-miR396c-5p//sbi-miR396c//gma-miR396b-5p//ptc-miR396c//ptc-miR396d//ptc-miR396e-5p//mtr-miR396a-5p//bna-miR396a//pta-miR396//gma-miR396c//aqc-miR396b//zma-miR396e-5p//zma-miR396f-5p//ccl-miR396//rco-miR396//aly-miR396b-5p//bgy-miR396b//bcy-miR396b//tcc-miR396c//tcc-miR396e//bdi-miR396e-5p//gma-miR396k-5p//cca-miR396a-5p//lus-miR396b//nta-miR396b//nta-miR396c//mdm-miR396c//mdm-m…	miRBASE2014	Exact	0	313.476	313.476	24	24	313.476	#DIV/0!	24	#DIV/0!	0	0	0	0	0	24	313.476	24	313.476	24
GGGTTGATATGAGAACACAC	20	ath-miR398b-5p//ath-miR398c-5p	miRBASE2014	Exact	0	274.291	274.291	21	21	274.291	#DIV/0!	21	#DIV/0!	0	0	0	0	0	21	274.291	21	274.291	21
GCCAAAGGAGAGTTGCCCTG	20	ath-miR399b//ath-miR399c-3p//osa-miR399d//sbi-miR399d//zma-miR399e-3p//sbi-miR399i//mtr-miR399l//mtr-miR399p//vvi-miR399b//vvi-miR399c//vvi-miR399i//pvu-miR399a//zma-miR399i-3p//zma-miR399j-3p//rco-miR399a//aly-miR399b-3p//aly-miR399c-3p//csi-miR399d//tcc-miR399a//tcc-miR399i//vun-miR399a//gma-miR399a//gma-miR399b//gma-miR399c//gma-miR399h//mdm-miR399i//mdm-miR399j//mes-miR399f	miRBASE2014	Exact	0	287.353	287.353	22	22	287.353	#DIV/0!	22	#DIV/0!	0	0	0	0	0	22	287.353	22	287.353	22
TAGATTCACGCACAAACT	18	ath-miR403-3p//ptc-miR403a//ptc-miR403b//ptc-miR403c-3p//vvi-miR403a//vvi-miR403b//vvi-miR403c//vvi-miR403d//vvi-miR403e//vvi-miR403f//rco-miR403a//rco-miR403b//aly-miR403a-3p//csi-miR403//tcc-miR403a//tcc-miR403b//gma-miR403a//gma-miR403b//bna-miR403//htu-miR403a//htu-miR403b//htu-miR403c//htu-miR403d//htu-miR403e//har-miR403a//hpe-miR403a//mdm-miR403a//mdm-miR403b//mes-miR403a//mes-miR403b//ptc…	miRBASE2014	Exact	0	222.045	222.045	17	17	222.045	#DIV/0!	17	#DIV/0!	0	0	0	0	0	17	222.045	17	222.045	17
TCGATGTCTAGCAGTGCCT	19	ath-miR775	miRBASE2014	Variant	1	287.353	287.353	22	22	287.353	#DIV/0!	22	#DIV/0!	0	0	0	0	0	22	287.353	22	287.353	22
CCCGGCAACGGCGCCA	16	ath-miR8175	miRBASE2014	Exact	0	222.045	222.045	17	17	222.045	#DIV/0!	17	#DIV/0!	0	0	0	0	0	17	222.045	17	222.045	17
CCGGCAACGGCGCCA	15	ath-miR8175	miRBASE2014	Exact	0	352.66	352.66	27	27	352.66	#DIV/0!	27	#DIV/0!	0	0	0	0	0	27	352.66	27	352.66	27
AGACCATTTGTGAGAAGGGA	20	ath-miR824-5p//bol-miR824//bra-miR824//bna-miR824//aly-miR824-5p	miRBASE2014	Exact	0	195.922	195.922	15	15	195.922	#DIV/0!	15	#DIV/0!	0	0	0	0	0	15	195.922	15	195.922	15
TAGATGACCATCAACAAACT	20	ath-miR827	miRBASE2014	Exact	0	339.598	339.598	26	26	339.598	#DIV/0!	26	#DIV/0!	0	0	0	0	0	26	339.598	26	339.598	26
TACGAGCCACTGGAAACTGAAAG	23	ath-miR841b-5p	miRBASE2014	Variant	2	456.28	456.28	22	22	-456.28	#DIV/0!	-22	#DIV/0!	22	456.28	22	456.28	22	0	0	0	0	0
CACTCCTCTTCTTCTTGATG	20	ath-miR847	miRBASE2014	Exact	0	559.98	559.98	27	27	-559.98	#DIV/0!	-27	#DIV/0!	27	559.98	27	559.98	27	0	0	0	0	0
GACAGAAGAGAGTGAGCACA	20	bna-miR156a//rco-miR156a//rco-miR156b//rco-miR156c//rco-miR156d//hvu-miR156a//tae-miR156//ssp-miR156//ssl-miR156//hvu-miR156b	miRBASE2014	Exact	0	208.984	208.984	16	16	208.984	#DIV/0!	16	#DIV/0!	0	0	0	0	0	16	208.984	16	208.984	16
CCCCACTTCTGACACCA	17	bta-miR-2478	miRBASE2014	Variant	1	248.168	248.168	19	19	248.168	#DIV/0!	19	#DIV/0!	0	0	0	0	0	19	248.168	19	248.168	19
TCCCACTTCTGACACCA	17	bta-miR-2478	miRBASE2014	Exact	0	378.783	378.783	29	29	378.783	#DIV/0!	29	#DIV/0!	0	0	0	0	0	29	378.783	29	378.783	29
CAGATCTAACTCTTCCAGCT	20	cte-miR-750//lgi-miR-750//isc-miR-750//ame-miR-750	miRBASE2014	Exact	0	208.984	208.984	16	16	208.984	#DIV/0!	16	#DIV/0!	0	0	0	0	0	16	208.984	16	208.984	16
ACCCTGTAGATCCGAATTTGTT	22	dme-miR-10-5p//dvi-miR-10-5p//aae-miR-10//cqu-miR-10-5p//hme-miR-10	miRBASE2014	Exact	0	208.984	208.984	16	16	208.984	#DIV/0!	16	#DIV/0!	0	0	0	0	0	16	208.984	16	208.984	16
CCCTGTAGATCCGAATTTGTT	21	dme-miR-10-5p//dvi-miR-10-5p//aae-miR-10//cqu-miR-10-5p//hme-miR-10	miRBASE2014	Exact	0	640.013	640.013	49	49	640.013	#DIV/0!	49	#DIV/0!	0	0	0	0	0	49	640.013	49	640.013	49
ACCCTGTAGATCCGAATTT	19	dme-miR-10-5p//hsa-miR-10a-5p//mmu-miR-10a-5p//rno-miR-10a-5p//dps-miR-10//dre-miR-10a-5p//aga-miR-10//ggo-miR-10a//ppy-miR-10a//sla-miR-10a//age-miR-10a//ppa-miR-10a//xtr-miR-10a//bmo-miR-10-5p//bta-miR-10a//mdo-miR-10a-5p//ame-miR-10//oan-miR-10a-5p//gga-miR-10a-5p//mml-miR-10a-5p//cfa-miR-10a//ptr-miR-10a//tca-miR-10-5p//dan-miR-10//der-miR-10//dgr-miR-10//dmo-miR-10//dpe-miR-10//dse-miR-10//d…	miRBASE2014	Exact	0	195.922	195.922	15	15	195.922	#DIV/0!	15	#DIV/0!	0	0	0	0	0	15	195.922	15	195.922	15
ACCCTGTAGATCCGAATTTG	20	dme-miR-10-5p//hsa-miR-10a-5p//mmu-miR-10a-5p//rno-miR-10a-5p//dps-miR-10//dre-miR-10a-5p//aga-miR-10//ggo-miR-10a//ppy-miR-10a//sla-miR-10a//age-miR-10a//ppa-miR-10a//xtr-miR-10a//bmo-miR-10-5p//bta-miR-10a//mdo-miR-10a-5p//ame-miR-10//oan-miR-10a-5p//gga-miR-10a-5p//mml-miR-10a-5p//cfa-miR-10a//ptr-miR-10a//tca-miR-10-5p//dan-miR-10//der-miR-10//dgr-miR-10//dmo-miR-10//dpe-miR-10//dse-miR-10//d…	miRBASE2014	Exact	0	470.213	470.213	36	36	470.213	#DIV/0!	36	#DIV/0!	0	0	0	0	0	36	470.213	36	470.213	36
ACCCTGTAGATCCGAATTTGT	21	dme-miR-10-5p//hsa-miR-10a-5p//mmu-miR-10a-5p//rno-miR-10a-5p//dps-miR-10//dre-miR-10a-5p//aga-miR-10//ggo-miR-10a//ppy-miR-10a//sla-miR-10a//age-miR-10a//ppa-miR-10a//xtr-miR-10a//bmo-miR-10-5p//bta-miR-10a//mdo-miR-10a-5p//ame-miR-10//oan-miR-10a-5p//gga-miR-10a-5p//mml-miR-10a-5p//cfa-miR-10a//ptr-miR-10a//tca-miR-10-5p//dan-miR-10//der-miR-10//dgr-miR-10//dmo-miR-10//dpe-miR-10//dse-miR-10//d…	miRBASE2014	Exact	0	16731.8	16731.8	1281	1281	16731.8	#DIV/0!	1281	#DIV/0!	0	0	0	0	0	1281	16731.8	1281	16731.8	1281
CCCTGTAGATCCGAATTTGT	20	dme-miR-10-5p//hsa-miR-10a-5p//mmu-miR-10a-5p//rno-miR-10a-5p//dps-miR-10//dre-miR-10a-5p//aga-miR-10//ggo-miR-10a//ppy-miR-10a//sla-miR-10a//age-miR-10a//ppa-miR-10a//xtr-miR-10a//bmo-miR-10-5p//bta-miR-10a//mdo-miR-10a-5p//ame-miR-10//oan-miR-10a-5p//gga-miR-10a-5p//mml-miR-10a-5p//cfa-miR-10a//ptr-miR-10a//tca-miR-10-5p//dan-miR-10//der-miR-10//dgr-miR-10//dmo-miR-10//dpe-miR-10//dse-miR-10//d…	miRBASE2014	Exact	0	1985.35	1985.35	152	152	1985.35	#DIV/0!	152	#DIV/0!	0	0	0	0	0	152	1985.35	152	1985.35	152
AGGAACTTCATACCGTGCT	19	dme-miR-276a-3p//dps-miR-276a//ame-miR-276//aga-miR-276-3p//bmo-miR-276-3p//tca-miR-276-3p//dan-miR-276a//der-miR-276a//dgr-miR-276a-3p//dmo-miR-276a//dpe-miR-276a//dse-miR-276a//dsi-miR-276a//dvi-miR-276a-3p//dwi-miR-276a-3p//dya-miR-276a//lmi-miR-276-3p//dpu-miR-276//api-miR-276//aae-miR-276-3p//cqu-miR-276-3p//nvi-miR-276//ngi-miR-276//nlo-miR-276//mse-miR-276	miRBASE2014	Exact	0	339.598	339.598	26	26	339.598	#DIV/0!	26	#DIV/0!	0	0	0	0	0	26	339.598	26	339.598	26
AGGAACTTCATACCGTGCTCT	21	dme-miR-276a-3p//dps-miR-276a//ame-miR-276//aga-miR-276-3p//bmo-miR-276-3p//tca-miR-276-3p//dan-miR-276a//der-miR-276a//dgr-miR-276a-3p//dmo-miR-276a//dpe-miR-276a//dse-miR-276a//dsi-miR-276a//dvi-miR-276a-3p//dwi-miR-276a-3p//dya-miR-276a//lmi-miR-276-3p//dpu-miR-276//api-miR-276//cqu-miR-276-3p//nvi-miR-276//ngi-miR-276//nlo-miR-276//mse-miR-276	miRBASE2014	Exact	0	653.074	653.074	50	50	653.074	#DIV/0!	50	#DIV/0!	0	0	0	0	0	50	653.074	50	653.074	50
TTTGATTGTTGCTCAGAAAGCCT	23	dvi-miR-315a//cte-miR-315//lgi-miR-315//api-miR-315//pma-miR-315	miRBASE2014	Variant	1	208.984	208.984	16	16	208.984	#DIV/0!	16	#DIV/0!	0	0	0	0	0	16	208.984	16	208.984	16
TGACAGAAGAGAGTGAGCACT	21	gma-miR156q//gma-miR156s	miRBASE2014	Exact	0	261.23	261.23	20	20	261.23	#DIV/0!	20	#DIV/0!	0	0	0	0	0	20	261.23	20	261.23	20
TCGTTGTAGTATAGTGGT	18	gma-miR6300	miRBASE2014	Variant	1	613.89	613.89	47	47	613.89	#DIV/0!	47	#DIV/0!	0	0	0	0	0	47	613.89	47	613.89	47
CGGACCAGGCTTCATTCCCT	20	osa-miR166m//crt-miR166b//csi-miR166d	miRBASE2014	Exact	0	311.1	311.1	15	15	-311.1	#DIV/0!	-15	#DIV/0!	15	311.1	15	311.1	15	0	0	0	0	0
TTGGGGGCTCGAAGACGATCA	21	peu-miR2916	miRBASE2014	Variant	2	300.414	300.414	23	23	300.414	#DIV/0!	23	#DIV/0!	0	0	0	0	0	23	300.414	23	300.414	23
GCACTGCCTCTTCCCTGGCT	20	ppt-miR408b//smo-miR408//cca-miR408//nta-miR408//stu-miR408b-3p	miRBASE2014	Exact	0	195.922	195.922	15	15	195.922	#DIV/0!	15	#DIV/0!	0	0	0	0	0	15	195.922	15	195.922	15
TTCACGTCGGGTTCACCA	18	ppt-miR894//osa-miR5077	miRBASE2014	Variant	1	457.152	457.152	35	35	457.152	#DIV/0!	35	#DIV/0!	0	0	0	0	0	35	457.152	35	457.152	35
CGACCTTAGCTCAGTTGGTA	20	ptc-miR6478	miRBASE2014	Variant	1	313.476	313.476	24	24	313.476	#DIV/0!	24	#DIV/0!	0	0	0	0	0	24	313.476	24	313.476	24
CGACCTTAGCTCAGTTGGTAG	21	ptc-miR6478	miRBASE2014	Variant	2	300.414	300.414	23	23	300.414	#DIV/0!	23	#DIV/0!	0	0	0	0	0	23	300.414	23	300.414	23

## Sheet: mir396
		Small RNA - Name	Small RNA - Resource	Small RNA - Match type	Small RNA - Mismatches	Experiment - Range (normalized values)	Experiment - IQR (normalized values)	Experiment - Range (original values)	Experiment - IQR (original values)	Experiment - Difference (normalized values)	Experiment - Fold Change (normalized values)	Experiment - Difference (original values)	Experiment - Fold Change (original values)	control - miR Col annotated - Expression values	control - miR Col annotated - Normalized expression values	control - miR Col annotated - Count	control - Normalized means	control - Means	oe - miR OE sample annotated - Expression values	oe - miR OE sample annotated - Normalized expression values	oe - miR OE sample annotated - Count	oe - Normalized means	oe - Means
TCCACAGCTTTCTTGAACTG	20	ath-miR396a-5p//osa-miR396a-5p//osa-miR396b-5p//sbi-miR396b//sbi-miR396a//sof-miR396//gma-miR396a-5p//zma-miR396b-5p//zma-miR396a-5p//ptc-miR396a//ptc-miR396b//mtr-miR396b-5p//ghr-miR396a//ghr-miR396b//vvi-miR396d//vvi-miR396c//lja-miR396//aqc-miR396a//aly-miR396a-5p//gma-miR396e//csi-miR396a//csi-miR396b//bgy-miR396a//bcy-miR396a//tcc-miR396a//tcc-miR396b//bdi-miR396d-5p//bdi-miR396c-5p//ssp-miR…	miRBASE2014	Exact	0	95.3895	95.3895	22	22	95.3895	1.18397	22	1.88	25	518.5	25	518.5	25	47	613.89	47	613.89	47
TTCAATAAAGCTGTGGGAAG	20	ath-miR396a-3p//gma-miR396a-3p//mtr-miR396b-3p//aly-miR396a-3p//gma-miR396i-3p//sly-miR396a-3p	miRBASE2014	Exact	0	868.312	868.312	80	80	868.312	2.82028	80	4.47826	23	477.02	23	477.02	23	103	1345.33	103	1345.33	103
TTCAATAAAGCTGTGGGAA	19	ath-miR396a-3p//osa-miR396a-3p//osa-miR396b-3p//gma-miR396a-3p//zma-miR396b-3p//zma-miR396a-3p//mtr-miR396b-3p//aly-miR396a-3p//bdi-miR396d-3p//bdi-miR396c-3p//gma-miR396i-3p//sly-miR396a-3p//ata-miR396e-3p	miRBASE2014	Exact	0	195.922	195.922	15	15	195.922	#DIV/0!	15	#DIV/0!	0	0	0	0	0	15	195.922	15	195.922	15
TTCAATAAAGCTGTGGGA	18	ath-miR396a-3p//osa-miR396a-3p//osa-miR396b-3p//gma-miR396a-3p//zma-miR396b-3p//zma-miR396a-3p//mtr-miR396b-3p//aly-miR396a-3p//bdi-miR396d-3p//bdi-miR396c-3p//gma-miR396i-3p//sly-miR396a-3p//ata-miR396e-3p	miRBASE2014	Exact	0	496.336	496.336	38	38	496.336	#DIV/0!	38	#DIV/0!	0	0	0	0	0	38	496.336	38	496.336	38
ACAGCTTTCTTGAACTG	17	ath-miR396a-5p//osa-miR396a-5p//osa-miR396b-5p//sbi-miR396b//sbi-miR396a//sof-miR396//gma-miR396a-5p//zma-miR396b-5p//zma-miR396a-5p//ptc-miR396a//ptc-miR396b//mtr-miR396b-5p//ghr-miR396a//ghr-miR396b//vvi-miR396d//vvi-miR396c//lja-miR396//aqc-miR396a//aly-miR396a-5p//gma-miR396e//csi-miR396a//csi-miR396b//bgy-miR396a//bcy-miR396a//tcc-miR396a//tcc-miR396b//bdi-miR396d-5p//bdi-miR396c-5p//ssp-miR…	miRBASE2014	Exact	0	222.045	222.045	17	17	222.045	#DIV/0!	17	#DIV/0!	0	0	0	0	0	17	222.045	17	222.045	17
CAGCTTTCTTGAACTG	16	ath-miR396a-5p//osa-miR396a-5p//osa-miR396b-5p//sbi-miR396b//sbi-miR396a//sof-miR396//gma-miR396a-5p//zma-miR396b-5p//zma-miR396a-5p//ptc-miR396a//ptc-miR396b//mtr-miR396b-5p//ghr-miR396a//ghr-miR396b//vvi-miR396d//vvi-miR396c//lja-miR396//aqc-miR396a//aly-miR396a-5p//gma-miR396e//csi-miR396a//csi-miR396b//bgy-miR396a//bcy-miR396a//tcc-miR396a//tcc-miR396b//bdi-miR396d-5p//bdi-miR396c-5p//ssp-miR…	miRBASE2014	Exact	0	1350.24	1350.24	141	141	1350.24	2.01724	141	3.20312	64	1327.36	64	1327.36	64	205	2677.6	205	2677.6	205
AGCTTTCTTGAACTG	15	ath-miR396a-5p//osa-miR396a-5p//osa-miR396b-5p//sbi-miR396b//sbi-miR396a//sof-miR396//gma-miR396a-5p//zma-miR396b-5p//zma-miR396a-5p//ptc-miR396a//ptc-miR396b//mtr-miR396b-5p//ghr-miR396a//ghr-miR396b//vvi-miR396d//vvi-miR396c//lja-miR396//aqc-miR396a//aly-miR396a-5p//gma-miR396e//csi-miR396a//csi-miR396b//bgy-miR396a//bcy-miR396a//tcc-miR396a//tcc-miR396b//bdi-miR396d-5p//bdi-miR396c-5p//ssp-miR…	miRBASE2014	Exact	0	1975.79	1975.79	397	397	1975.79	1.22791	397	1.94976	418	8669.32	418	8669.32	418	815	10645.1	815	10645.1	815
CTCAAGAAAGCTGTGGGAAA	20	ath-miR396b-3p//aly-miR396b-3p//bra-miR396-3p	miRBASE2014	Exact	0	431.029	431.029	33	33	431.029	#DIV/0!	33	#DIV/0!	0	0	0	0	0	33	431.029	33	431.029	33
TCCACAGCTTTCTTGAACTT	20	ath-miR396b-5p//osa-miR396c-5p//sbi-miR396c//gma-miR396b-5p//ptc-miR396c//ptc-miR396d//ptc-miR396e-5p//mtr-miR396a-5p//bna-miR396a//pta-miR396//gma-miR396c//aqc-miR396b//zma-miR396e-5p//zma-miR396f-5p//ccl-miR396//rco-miR396//aly-miR396b-5p//bgy-miR396b//bcy-miR396b//tcc-miR396c//tcc-miR396e//bdi-miR396e-5p//gma-miR396k-5p//cca-miR396a-5p//lus-miR396b//nta-miR396b//nta-miR396c//mdm-miR396c//mdm-m…	miRBASE2014	Exact	0	313.476	313.476	24	24	313.476	#DIV/0!	24	#DIV/0!	0	0	0	0	0	24	313.476	24	313.476	24
TACACAGCTTTCTTGAACTG	20	ath-miR396a-5p//osa-miR396a-5p//osa-miR396b-5p//sbi-miR396b//sbi-miR396a//sof-miR396//gma-miR396a-5p//zma-miR396b-5p//zma-miR396a-5p//ptc-miR396a//ptc-miR396b//mtr-miR396b-5p//ghr-miR396a//ghr-miR396b//vvi-miR396d//vvi-miR396c//lja-miR396//aqc-miR396a//aly-miR396a-5p//gma-miR396e//csi-miR396a//csi-miR396b//bgy-miR396a//bcy-miR396a//tcc-miR396a//tcc-miR396b//bdi-miR396d-5p//bdi-miR396c-5p//ssp-miR…	miRBASE2014	Variant	1	373.32	373.32	18	18	-373.32	#DIV/0!	-18	#DIV/0!	18	373.32	18	373.32	18	0	0	0	0	0
CACAGCTTTCTTGAACTGC	19	ath-miR396a-5p//osa-miR396a-5p//osa-miR396b-5p//sbi-miR396b//sbi-miR396a//sof-miR396//gma-miR396a-5p//zma-miR396b-5p//zma-miR396a-5p//ptc-miR396a//ptc-miR396b//mtr-miR396b-5p//ghr-miR396a//ghr-miR396b//vvi-miR396d//vvi-miR396c//lja-miR396//aqc-miR396a//aly-miR396a-5p//gma-miR396e//csi-miR396a//csi-miR396b//bgy-miR396a//bcy-miR396a//tcc-miR396a//tcc-miR396b//bdi-miR396d-5p//bdi-miR396c-5p//ssp-miR…	miRBASE2014	Variant	1	235.107	235.107	18	18	235.107	#DIV/0!	18	#DIV/0!	0	0	0	0	0	18	235.107	18	235.107	18
