# Supplementary material for: Overexpression of Arabidopsis thaliana ERI, the homolog of C. elegans Enhancer of RNAinterference, leads to enhanced growth
Source: Front Plant Sci. 2015 Jul 22;6:531. doi: 10.3389/fpls.2015.00531 (PMC4510415; doi:10.3389/fpls.2015.00531)
Supplement: Supplementary file 2 [file Table2.XLSX]

## Sheet: siRNA-all in ERIOE vs WT
Supplementary Table 2		siRNA regions		ERI-BIOMASS
Gene	logFC	logCPM	PValue
AT4G24080	15.186	7.44946	1.30505e-34	ALL1 (AT4G24080) aldolase like protein					few present in col				more siRNA	less siRNA	in the mutant compared to wild type
AT3G50845	13.5964	5.87566	3.98189e-27									genes	116	5
AT1G79410	13.3567	5.63888	5.21368e-26	organic cation/carnitine transporter5
AT4G26390	13.0546	5.3426	7.93774e-25	probable pyruvate kinase								means	silencing	reduced silencing
AT3G11340	12.8319	5.12487	6.32038e-24	UDP-dependent glycosyltransferase 76B1 i									in ERI-OE	in ERI-OE
AT4G36160	12.8137	5.10867	7.08644e-24	NAC domain containing protein 76 i
AT4G36170	12.8137	5.10867	7.15713e-24
AT5G66860	12.7297	9.57986	2.88519e-41	ribosomal protein L25/Gln-tRNA synthetase
AT5G39820	12.664	4.96116	1.99013e-22	NAC domain containing protein 94
AT5G42710	12.3011	4.60892	7.35583e-21
AT3G05320	12.2923	4.60044	7.5353e-21	O-fucosyltransferase family protein
AT2G27120	12.287	4.59763	7.1834e-21	DNA polymerase epsilon catalytic subunit B
AT1G20700	11.7423	4.07461	1.32531e-18	WUSCHEL-related homeobox 14						no miR
AT3G25810	11.6464	3.9798	3.47069e-18	terpene synthase
AT2G27285	11.5526	3.89414	1.86777e-17	Coiled-coil domain-containing protein 55
AT2G31985	11.2749	3.62711	1.73938e-16
AT4G12490	11.2425	3.60105	1.90368e-16	EARLI1-like
AT4G12500	11.2425	3.59651	1.98492e-16	EARLI1-LIKE HYBRID PROLINE-RICH PROTEIN 2
AT4G27750	11.183	3.54514	4.56048e-16	ISI1 (AT4G27750) impaired sucrose induction 1 protein i					24er	no miR		Sucrose/growth related
AT3G10560	10.984	3.35341	4.67257e-15	UNE9 (AT3G10560) cytochrome P450 protein UNE9 i
AT2G32788	10.9576	3.32871	4.98642e-15	Rapid ALkalinization Factor family protein
AT3G20395	10.5502	2.95687	7.2211e-15	RING-finger domain-containing protein
AT3G09690	10.4716	2.89206	2.61714e-14	alpha/beta-Hydrolases superfamily protein
AT3G14140	10.4338	2.84257	3.92751e-14	oxidoreductase, 2OG-Fe(II) oxygenase family protein
AT5G60250	10.4252	6.34993	2.01559e-28	C3H4 type zinc finger protein
AT2G23210	10.4145	2.83249	5.59795e-14
AT2G23360	10.395	2.8069	8.96832e-14	filament-like plant protein 7
AT5G55540	10.321	2.73905	2.59081e-13	TRN1 (AT5G55540) protein TORNADO 1					24er present	no miR	21 become abundant in rdr2
AT5G42410	10.2576	2.68097	9.28573e-13	SAUR-like auxin-responsive protein
AT5G38340	10.2062	2.63406	3.51339e-13	TIR-NBS-LRR class disease resistance protein
AT3G53160	10.1988	2.62723	3.48029e-13	UGT73C7 (AT3G53160) UDP-glucosyl transferase 73C7
AT5G03390	10.1057	2.5425	1.83723e-12
AT1G45130	10.0013	5.93195	9.41108e-26	BGAL5 (AT1G45130) beta-galactosidase 5
AT5G40520	9.94494	2.40695	1.98789e-11
AT4G27595	9.79874	6.66275	4.40222e-29
AT1G12420	9.79697	5.73427	7.96913e-25	ACR8 (AT1G12420) ACT domain repeat 8 protein
AT1G75450	9.7941	2.28312	1.88629e-10	CKX5 (AT1G75450) cytokinin dehydrogenase 5
AT1G09290	9.71231	2.18746	2.16302e-10
AT1G09300	9.71231	2.2109	3.58893e-10	Metallopeptidase M24 family protein
AT5G27430	9.38291	1.89448	6.54999e-09	Signal peptidase complex subunit 3B
AT5G33340	9.2873	1.81021	8.37903e-09	CDR1 (AT5G33340) aspartic proteinase CDR1
AT5G35830	9.15425	1.69356	3.14188e-08	ankyrin repeat-containing protein
AT4G26160	9.10703	1.65233	4.2722e-08	ACHT1 (AT4G26160) atypical CYS HIS rich thioredoxin 1
AT5G16180	9.09094	1.65539	4.70312e-08	CRS1 (AT5G16180) chloroplast splicing factor CRS1-like protein
AT3G47630	8.86359	1.4608	6.82001e-07
AT3G04830	8.7245	1.34304	2.39152e-06	prenylyltransferase-like protein
AT5G23570	8.7245	1.32181	2.41985e-06	SGS3 (AT5G23570) protein SUPPRESSOR OF GENE SILENCING 3						no miR
AT3G15140	8.70349	1.30385	2.8946e-06	polynucleotidyl transferase, ribonuclease H-like superfamily protein						miR5021
AT2G01090	8.5506	4.51595	6.70417e-19	ubiquinol-cytochrome c reductase hinge protein
AT4G25470	8.4992	1.13028	7.72919e-06	CBF2 (AT4G25470) dehydration-responsive element-binding protein 1C
AT1G16160	8.42412	1.06701	1.1496e-05	WAKL5 (AT1G16160) wall-associated receptor kinase-like 5
AT1G21990	8.20243	0.910686	6.89013e-05	F-box/RNI-like/FBD-like domains-containing protein
AT4G15093	8.14124	0.83136	0.000106308	extradiol ring-cleavage dioxygenase
AT1G48910	8.0443	0.7831	0.000159369	YUC10 (AT1G48910) flavin-containing monooxygenase YUCCA10
AT3G52100	8.01048	0.787438	3.05043e-05	RING/FYVE/PHD zinc finger-containing protein
AT3G15220	7.97585	0.728414	3.33483e-05	putative protein kinase
AT1G19300	7.90001	4.80167	2.16467e-19	PARVUS (AT1G19300) putative galacturonosyltransferase-like 1
AT4G12820	7.74857	0.936315	0.00134485	putative F-box/kelch-repeat protein
AT1G13560	7.73393	5.192	6.49734e-21	AAPT1 (AT1G13560) aminoalcoholphosphotransferase 1
AT5G58640	7.67982	3.69825	3.55901e-15	Selenoprotein, Rdx type
AT1G18640	7.66409	0.444929	0.000208226	PSP (AT1G18640) phosphoserine phosphatase
AT3G47160	7.61991	0.409953	0.000241837	AT3G47160 RING/U-box domain-containing protein
AT5G41080	7.57435	0.374026	0.00033476	glycerophosphoryl diester phosphodiesterase family protein
AT2G32620	7.52729	0.337097	0.00042476	CSLB02 (AT2G32620) cellulose synthase-like protein B2
AT2G46640	7.52729	0.337097	0.000424023	TILLER ANGLE CONTROL 1
AT2G01070	7.50138	3.52248	2.06042e-14	lung seven transmembrane receptor-like protein
AT2G43500	7.42832	0.38891	0.000700982	nodule inception protein-like protein 8
AT1G55300	7.32204	0.270261	0.00110177	TAF7 (AT1G55300) TBP-associated factor 7
AT3G19740	7.2349	4.1793	1.43769e-16	AAA-type ATPase domain-containing protein
AT1G01610	7.02907	3.98632	8.00026e-16	GPAT4 (AT1G01610) bifunctional sn-glycerol-3-phosphate 2-O-acyltransferase/phosphatase
AT3G18890	7.0014	3.06582	5.53608e-14	AT3G18890 protein TIC 62
AT1G20960	6.86106	6.2822	1.75908e-22	emb1507 (AT1G20960) putative U5 small nuclear ribonucleoprotein helicase
AT2G45460	6.84522	2.93073	5.40406e-13	SMAD/FHA domain-containing protein
AT5G32460	6.79551	2.86363	1.54453e-12	transcriptional factor B3 family protein						no miR
AT5G36290	6.79221	3.74156	1.36418e-14
AT3G50500	6.55526	2.6706	4.46758e-11	SNRK2.2 (AT3G50500) serine/threonine-protein kinase SRK2D					24/25 er	no miR	21er became abundand in rdr2	Sucrose/growth related
AT3G09740	6.50201	2.62323	1.73917e-11	SYP71 (AT3G09740) syntaxin-71
AT1G16270	6.44672	2.56507	5.21909e-11	octicosapeptide/Phox/Bem1p domain-containing protein kinase
AT2G01390	6.38081	2.48727	2.15979e-10	pentatricopeptide repeat-containing protein
AT3G49690	6.25771	2.37677	1.12597e-09	MYB84 (AT3G49690) transcription factor RAX3						miR5015b / miR858b
AT1G14670	6.22555	3.2483	1.12144e-12	putative endomembrane protein 70
AT4G17140	6.2031	4.12932	3.07688e-15	pleckstrin homology (PH) domain-containing protein
AT3G47850	5.94596	2.98448	8.31294e-13
AT1G32750	5.77344	3.36777	3.4455e-12	HAF01 (AT1G32750) histone acetyltransferase of the CBP family 13
AT3G04090	5.66429	1.85264	1.07894e-07	SIP1A (AT3G04090) aquaporin SIP1-1
AT4G34930	5.549	1.75255	1.18489e-07	1-phosphatidylinositol phosphodiesterase-related protein
AT5G57410	5.40724	1.63031	5.56151e-07	Afadin/alpha-actinin-binding protein
AT5G57240	5.32201	1.55728	1.01779e-06	ORP4C (AT5G57240) OSBP(oxysterol binding protein)-related protein 4C
AT2G29690	5.21261	1.52127	2.11928e-06	ASA2 (AT2G29690) anthranilate synthase component I-2
AT1G11380	4.98758	1.27424	1.97888e-05	PLAC8 family protein
AT1G06190	4.9426	1.23663	2.51966e-05	ribonucleic acid-binding protein RHON1
AT4G16310	4.63863	1.01233	0.000104684	LDL3 (AT4G16310) protein LSD1-like 3
AT5G45520	4.45867	0.869206	0.000412811	Leucine-rich repeat (LRR) family protein
AT2G31790	4.35567	2.45259	5.36646e-08	UDP-glycosyltransferase 74C1
AT1G79990	4.15628	2.79789	2.37836e-08	coatomer subunit beta'-1
AT1G11300	4.15283	1.46791	4.45392e-05	protein EGM1
AT2G40770	4.08562	2.2118	1.02924e-06	RING-finger, DEAD-like helicase, PHD and SNF2 domain-containing protein
AT5G17910	3.74397	2.45563	9.27228e-07
AT4G31265	3.66751	2.19628	0.000230054	tRNA
AT4G39865	3.63781	2.14015	0.00013434	tRNA
AT3G44340	3.50494	2.03268	1.15193e-05	CEF (AT3G44340) transport protein sec24-like CEF
AT2G35940	3.45746	2.62252	9.27054e-06	BLH1 (AT2G35940) BEL1-like homeodomain 1				23/24 abundant in col		no miR	21er became abundand in rdr2
AT1G62560	3.44359	3.2315	3.61607e-07	FMO GS-OX3 (AT1G62560) flavin-containing monooxygenase FMO GS-OX3
AT5G54310	3.37527	1.609	0.000127457	AGD5 (AT5G54310) putative ADP-ribosylation factor GTPase-activating protein AGD5
AT4G14350	2.985	1.32087	0.00119743	AGC (cAMP-dependent, cGMP-dependent and protein kinase C) kinase family protein
AT1G71890	2.88742	1.35657	0.00132261	SUC5 (AT1G71890) sucrose transport protein SUC5				23/24 abundant in col		no miR		Sucrose/growth related
AT3G28958	2.84653	1.51948	0.000935258	plastocyanin-like domain-containing protein
AT5G10235	2.82426	3.40255	8.35628e-05	tRNA
AT2G22280	2.74048	2.32335	0.000800755	tRNA
AT2G24390	2.51323	3.50794	0.000224451	AIG2-like family protein
AT2G24380	2.50743	3.50421	0.00024123	tRNA
AT2G07743	2.1706	10.0711	0.000282311	tRNA
ATMG01060	2.16975	10.0741	0.000280492
ATMG01070	2.16972	10.0737	0.000278832
ATCG00620	1.92139	11.3597	0.000599235
AT5G53487	1.76472	8.99476	0.00138979	tRNA
AT2G36400	-2.02622	3.62199	0.000516268	GRF3 (AT2G36400) growth-regulating factor 3							21er became abundand in rdr2
AT3G52910	-2.05527	3.61842	0.000483895	GRF4 (AT3G52910) growth-regulating factor 4							21er became abundand in rdr2
AT2G17033	-2.26204	2.19855	0.00125456	pentatricopeptide repeat-containing protein							mir?
AT1G26235	-4.79504	0.435247	0.000616442	ncRNA							21er became abundand in rdr2
AT1G47389	-7.53908	0.749082	0.000173274
