# Supplementary material for: Overexpression of Arabidopsis thaliana ERI, the homolog of C. elegans Enhancer of RNAinterference, leads to enhanced growth
Source: Front Plant Sci. 2015 Jul 22;6:531. doi: 10.3389/fpls.2015.00531 (PMC4510415; doi:10.3389/fpls.2015.00531)
Supplement: Supplementary file 3 [file Table3.XLSX]

## Sheet: ERI Primer
Supplementary Table 3		Primer	ERI-BIOMASS
name	target gene	sequence			purpose
Promotor800 for	AtERI	ccatggcacgtctatgaaaatctgtatc			ERI Promotor
Promotor800 rev		ccatggtttcgtcgattagcatgaagattg			construct
ERI full for	AtERI	gaggatccaatggcgtccgcattctctgc			ERI genomic
ERI full rev		aagatccttacttgatcctgttcttga			amplif.
ERI OE for	AtERI	gactagtgcgtccgcattctctgaa			ERI OE
eri KO for	AtERI	agttcctttgaacaatcgtggt			T-DNA insertion genomic
eri KO rev		cttgtattacacccacggaaag			RT-qPCR
GUS genomic for	beta-Glucuronidase	cgacagtttcacttgttcagatgc
GUS genomic rev		gctaggataccactctactcg
GUS-probe 5´for	beta-Glucuronidase	gccgggcaattgctgtgccagg
GUS-probe 5´rev		taaagaaatcatggaagtaagac
GUS-probe 3´for	beta-Glucuronidase	cccgacgcgtccgatcacctgcgt			siRNA probe
GUS-probe 3´rev		ttgtttgcctccctgctgcggtt
GUS for	beta-Glucuronidase	gccgggcaattgctgtgccagg			GUS test
GUS rev		tcgcgctgataccagacgtg			genotype
GFP for	Green fluorescent protein	atccccggccgccccgactctag			GFP test
GFP rev		atggtgagcggcgaggagctgttc			genotype
PFK for	Phosphofructokinase	ccatgtgcatctctctcaagc			RT-qPCR
PFK rev		gtcttagccgaaggaaacgtc
SCL6 III for	Scarecrow-like	accaagaccagtcagcggtaatc		Boutet et al. 2003	RT-qPCR
SCL6 III rev		agtgtcgtcgttgttgttgttaagg
miR159a-probe		tagagctcccttcaatccaaaga			probe
ATSN1-bi for		caatatacratccaaaaaacarttattaaaataatatcttaa
ATSN1-bi rev		gttgtataagtttagttttaattttayggatyagtattaattt
universal		gtgcagggtccgaggt			miRNA
miRNA156 forward		gcggcggtgacagaagagagt
miRNA156 RT reverse		gtcgtatccagtgcagggtccgaggtattcgcactgg
miRNA159 forward		gcggcgtttggattgaag
miRNA159 RT reverse		gtcgtatccagtgcagggtccgaggtattcgcactgg
siRNA GUS for	beta-Glucuronidase
GUS-si sequenz		tgccagttcagttcgttgttc			siRNA
GUS-si-RT		GTCGTATCCAGTGCAGGGTCCGAGGTATTCGCACTGGATACGACgaacaa
GUS-si-F		tgccagttcagttcg
mir156-RTprimer	R	GTCGTATCCAGTGCAGGGTCCGAGGTATTCGCACTGGATACGACGTGCTC
mir156-Forwardprimer	F	GCGGCGGTGACAGAAGAGAGT
mir166-RTprimer	R	GTCGTATCCAGTGCAGGGTCCGAGGTATTCGCACTGGATACGACGGGGAA
mir166-Forwardprimer	f	TCGCTTCGGACCAGGCTTCA
